# Supplementary material
Source: Royal Society of Chemistry journal article supplement (doi:10.1039/d6ma00607h)
Supplement: d6ma00607h1.pdf [file d6ma00607h1.pdf]

**Prediction of proton conductivity using machine learning and exploration of proton-conductive ceramics**

Yuji Okuyama,<sup>\*a</sup> Renta Kawakami,<sup>b</sup> and Kota Douzono,<sup>b</sup>

a. *Department of Applied Chemistry, Faculty of Engineering, University of Miyazaki, 1-1 Gakuenkibanadai-nishi, Miyazaki 889-2192 Japan Email: okuyama@miyazaki-u.ac.jp*

b. *Department of Environmental Robotics, Mechanical Systems and Informatics Course, Graduate School of Engineering, University of Miyazaki, 1-1 Gakuenkibanadai-nishi, Miyazaki 889-2192, Japan*

### Training

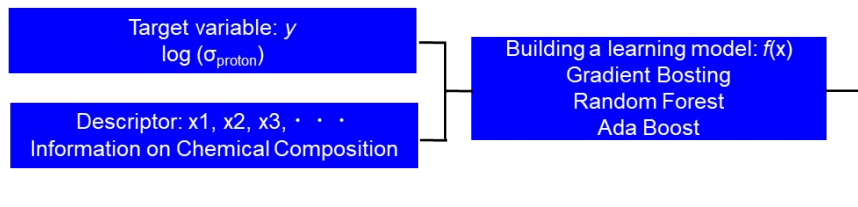

### Prediction

Prediction of proton conductivity for virtual composition,  $y_i=f(x_i)$

- Selection of matrix
- Selection of dopant

### Verification

Experimental Verification  
Proton conductivity measurement

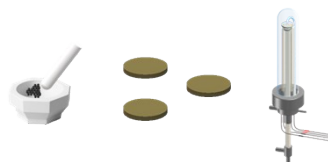

Material exploration was conducted through the following steps:

1. Construction of a machine learning model to predict proton conductivity
2. Material selection based on predicted proton conductivity of hypothetical compositions
3. Synthesis of recommended materials and evaluation of their proton conductivity

Figure S1 Flow of learning model construction, prediction, and validation.

## Dataset of proton conductivity and hole conductivity

In this study, the supervised machine learning model used experimental proton conductivities from 76 compositions and 726 samples (Table S1). Proton conductivity was determined by impedance measurements using the AC two-terminal method. All samples were dense discs and were measured under conditions where the water vapor pressure ranged from 0.01 to 0.019. The hole conductivity was primarily derived from reports of impedance measurements in air. The measurement and synthesis conditions for each sample are described in SI file: Supplementary Information 2.

Table S1 dataset of proton conductivity

| Dataset 1<br>Dataset of II-IV type perovskite oxide                                                        |        |      |                                                                          |        |      | Dataset 2<br>Dataset of III-III type perovskite oxide                                  |        |      |                                                                                        |        |      |
|------------------------------------------------------------------------------------------------------------|--------|------|--------------------------------------------------------------------------|--------|------|----------------------------------------------------------------------------------------|--------|------|----------------------------------------------------------------------------------------|--------|------|
| composition                                                                                                | number | ref. | composition                                                              | number | ref. | composition                                                                            | number | ref. | composition                                                                            | number | ref. |
| BaCe <sub>0.45</sub> Zr <sub>0.35</sub> Y <sub>0.1</sub> Yb <sub>0.1</sub> O <sub>3</sub>                  | 3      |      | BaZr <sub>0.8</sub> Lu <sub>0.2</sub> O <sub>3</sub>                     | 37     | 2    | Ga <sub>0.9</sub> Sr <sub>0.1</sub> InO <sub>3</sub>                                   | 3      |      | La <sub>0.84</sub> Ba <sub>0.06</sub> YbO <sub>3</sub>                                 | 10     |      |
| BaCe <sub>0.6</sub> Zr <sub>0.2</sub> Y <sub>0.2</sub> O <sub>3</sub>                                      | 4      | 1    | BaZr <sub>0.8</sub> Sc <sub>0.2</sub> O <sub>3</sub>                     | 30     | 2    | La <sub>0.9</sub> Ba <sub>0.1</sub> In <sub>0.9</sub> Sc <sub>0.1</sub> O <sub>3</sub> | 3      |      | La <sub>0.98</sub> Ba <sub>0.02</sub> YbO <sub>3</sub>                                 | 8      |      |
| BaCe <sub>0.7</sub> Zr <sub>0.1</sub> Y <sub>0.1</sub> Yb <sub>0.1</sub> O <sub>3</sub>                    | 3      |      | BaZr <sub>0.8</sub> Tm <sub>0.2</sub> O <sub>3</sub>                     | 5      | 2    | La <sub>0.9</sub> Sr <sub>0.1</sub> InO <sub>3</sub>                                   | 10     | 7    | La <sub>0.9</sub> Ba <sub>0.1</sub> Yb <sub>0.9</sub> In <sub>0.9</sub> O <sub>3</sub> | 7      |      |
| BaCe <sub>0.8</sub> Y <sub>0.2</sub> O <sub>3</sub>                                                        | 5      |      | BaZr <sub>0.8</sub> Y <sub>0.2</sub> O <sub>3</sub>                      | 38     | 2    | La <sub>0.9</sub> Sr <sub>0.1</sub> Y <sub>0.2</sub> In <sub>0.8</sub> O <sub>3</sub>  | 13     |      | La <sub>0.9</sub> Ba <sub>0.1</sub> YbO <sub>3</sub>                                   | 10     | 10   |
| Ba <sub>0.3</sub> Sr <sub>0.7</sub> Zr <sub>0.44</sub> Ce <sub>0.38</sub> Y <sub>0.22</sub> O <sub>3</sub> | 5      |      | BaZr <sub>0.8</sub> Yb <sub>0.2</sub> O <sub>3</sub>                     | 5      | 2    | La <sub>0.9</sub> Sr <sub>0.1</sub> Yb <sub>0.2</sub> In <sub>0.8</sub> O <sub>3</sub> | 11     | 8    | La <sub>0.9</sub> Ca <sub>0.1</sub> YbO <sub>3</sub>                                   | 6      | 10   |
| Ba <sub>0.5</sub> Sr <sub>0.4</sub> Zr <sub>0.8</sub> Yb <sub>0.2</sub> O <sub>3</sub>                     | 4      |      | BaZr <sub>0.9</sub> Yb <sub>0.1</sub> O <sub>3</sub>                     | 7      |      | La <sub>0.9</sub> Sr <sub>0.1</sub> Y <sub>0.5</sub> In <sub>0.2</sub> O <sub>3</sub>  | 11     | 7    | La <sub>0.9</sub> Mg <sub>0.1</sub> YbO <sub>3</sub>                                   | 4      | 10   |
| BaCe <sub>0.16</sub> Zr <sub>0.84</sub> Y <sub>0.1</sub> Yb <sub>0.1</sub> O <sub>3</sub>                  | 3      |      | CaZr <sub>0.95</sub> Y <sub>0.05</sub> O <sub>3</sub>                    | 3      | 3    | La <sub>0.9</sub> Sr <sub>0.1</sub> Y <sub>0.5</sub> In <sub>0.8</sub> O <sub>3</sub>  | 11     |      | La <sub>0.9</sub> Sr <sub>0.1</sub> Y <sub>0.2</sub> Yb <sub>0.8</sub> O <sub>3</sub>  | 11     | 8    |
| BaZr <sub>0.44</sub> Ce <sub>0.38</sub> Y <sub>0.2</sub> O <sub>3</sub>                                    | 3      |      | CaZr <sub>0.98</sub> In <sub>0.02</sub> O <sub>3</sub>                   | 8      |      | La <sub>0.9</sub> Sr <sub>0.1</sub> Y <sub>0.5</sub> Yb <sub>0.2</sub> O <sub>3</sub>  | 10     | 8    | La <sub>0.9</sub> Sr <sub>0.1</sub> Yb <sub>0.9</sub> In <sub>0.2</sub> O <sub>3</sub> | 11     | 8    |
| BaZr <sub>0.55</sub> Yb <sub>0.2</sub> In <sub>0.25</sub> O <sub>3</sub>                                   | 9      |      | CaZr <sub>0.98</sub> Yb <sub>0.02</sub> O <sub>3</sub>                   | 3      | 3    | La <sub>0.9</sub> Sr <sub>0.1</sub> Y <sub>0.8</sub> In <sub>0.2</sub> O <sub>3</sub>  | 11     |      | La <sub>0.9</sub> Sr <sub>0.1</sub> Yb <sub>0.9</sub> In <sub>0.2</sub> O <sub>3</sub> | 11     | 9    |
| BaZr <sub>0.5</sub> Yb <sub>0.2</sub> In <sub>0.3</sub> O <sub>3</sub>                                     | 8      |      | CaZr <sub>0.98</sub> In <sub>0.02</sub> O <sub>3</sub>                   | 4      |      | La <sub>0.9</sub> Sr <sub>0.1</sub> Y <sub>0.8</sub> Yb <sub>0.2</sub> O <sub>3</sub>  | 11     | 8    | La <sub>0.9</sub> Sr <sub>0.1</sub> Yb <sub>0.9</sub> In <sub>0.1</sub> O <sub>3</sub> | 11     | 8    |
| BaZr <sub>0.9</sub> Yb <sub>0.2</sub> In <sub>0.3</sub> O <sub>3</sub>                                     | 8      |      | CaZr <sub>0.995</sub> Al <sub>0.005</sub> O <sub>3</sub>                 | 12     | 4    | La <sub>0.9</sub> Sr <sub>0.1</sub> Y <sub>0.3</sub> O <sub>3</sub>                    | 9      | 7    | La <sub>0.9</sub> Sr <sub>0.1</sub> YbO <sub>3</sub>                                   | 11     | 7    |
| BaZr <sub>0.8</sub> Yb <sub>0.2</sub> Lu <sub>0.2</sub> O <sub>3</sub>                                     | 7      |      | SrCe <sub>0.7</sub> Yb <sub>0.3</sub> O <sub>3</sub>                     | 5      |      | La <sub>0.9</sub> Ba <sub>0.7</sub> Yb <sub>0.9</sub> In <sub>0.5</sub> O <sub>3</sub> | 3      |      | LaBa <sub>0.02</sub> Yb <sub>0.98</sub> O <sub>3</sub>                                 | 9      |      |
| BaZr <sub>0.8</sub> Yb <sub>0.2</sub> Sc <sub>0.2</sub> O <sub>3</sub>                                     | 8      |      | SrCe <sub>0.85</sub> Yb <sub>0.15</sub> O <sub>3</sub>                   | 11     |      | La <sub>0.9</sub> Ba <sub>0.5</sub> Yb <sub>0.9</sub> In <sub>0.5</sub> O <sub>3</sub> | 3      |      | Nd <sub>0.9</sub> Sr <sub>0.1</sub> InO <sub>3</sub>                                   | 6      |      |
| BaZr <sub>0.7</sub> Lu <sub>0.2</sub> Sc <sub>0.1</sub> O <sub>3</sub>                                     | 7      |      | SrCe <sub>0.85</sub> Yb <sub>0.15</sub> O <sub>3</sub>                   | 11     |      | La <sub>0.7</sub> Ba <sub>0.3</sub> Yb <sub>0.9</sub> In <sub>0.5</sub> O <sub>3</sub> | 3      |      | Sm <sub>0.9</sub> Sr <sub>0.1</sub> InO <sub>3</sub>                                   | 6      |      |
| BaZr <sub>0.7</sub> Sc <sub>0.3</sub> O <sub>3</sub>                                                       | 8      |      | SrCe <sub>0.97</sub> Yb <sub>0.03</sub> O <sub>3</sub>                   | 11     |      |                                                                                        |        |      |                                                                                        |        |      |
| BaZr <sub>0.7</sub> Y <sub>0.2</sub> Sc <sub>0.1</sub> O <sub>3</sub>                                      | 7      |      | SrCe <sub>0.98</sub> Yb <sub>0.02</sub> O <sub>3</sub>                   | 11     |      |                                                                                        |        |      |                                                                                        |        |      |
| BaZr <sub>0.7</sub> Yb <sub>0.2</sub> Al <sub>0.1</sub> O <sub>3</sub>                                     | 7      |      | SrCe <sub>0.9</sub> Sc <sub>0.05</sub> Gd <sub>0.05</sub> O <sub>3</sub> | 3      |      |                                                                                        |        |      |                                                                                        |        |      |
| BaZr <sub>0.7</sub> Yb <sub>0.2</sub> In <sub>0.1</sub> O <sub>3</sub>                                     | 8      |      | SrCe <sub>0.9</sub> Y <sub>0.1</sub> O <sub>3</sub>                      | 11     | 5    |                                                                                        |        |      |                                                                                        |        |      |
| BaZr <sub>0.7</sub> Yb <sub>0.2</sub> Lu <sub>0.1</sub> O <sub>3</sub>                                     | 7      |      | SrCe <sub>0.9</sub> Yb <sub>0.1</sub> O <sub>3</sub>                     | 11     |      |                                                                                        |        |      |                                                                                        |        |      |
| BaZr <sub>0.7</sub> Yb <sub>0.2</sub> Sc <sub>0.1</sub> O <sub>3</sub>                                     | 7      |      | SrZr <sub>0.3</sub> Ce <sub>0.6</sub> Y <sub>0.1</sub> O <sub>3</sub>    | 11     | 5    |                                                                                        |        |      |                                                                                        |        |      |
| BaZr <sub>0.7</sub> Yb <sub>0.3</sub> O <sub>3</sub>                                                       | 8      |      | SrZr <sub>0.4</sub> Ce <sub>0.4</sub> Y <sub>0.1</sub> O <sub>3</sub>    | 11     | 6    |                                                                                        |        |      |                                                                                        |        |      |
| BaZr <sub>0.8</sub> Er <sub>0.2</sub> O <sub>3</sub>                                                       | 32     |      | SrZr <sub>0.7</sub> Ce <sub>0.2</sub> Y <sub>0.1</sub> O <sub>3</sub>    | 11     | 5    |                                                                                        |        |      |                                                                                        |        |      |
| BaZr <sub>0.8</sub> Gd <sub>0.2</sub> O <sub>3</sub>                                                       | 26     |      | SrZr <sub>0.8</sub> Sc <sub>0.2</sub> O <sub>3</sub>                     | 3      |      |                                                                                        |        |      |                                                                                        |        |      |
| BaZr <sub>0.8</sub> In <sub>0.2</sub> O <sub>3</sub>                                                       | 33     |      | SrZr <sub>0.8</sub> Y <sub>0.1</sub> O <sub>3</sub>                      | 11     |      |                                                                                        |        |      |                                                                                        |        |      |

Table S2 dataset of hole conductivity

| composition                                                                                               | number | ref. | composition                                                                                                | number | ref. | composition                                                                            | number | ref. |
|-----------------------------------------------------------------------------------------------------------|--------|------|------------------------------------------------------------------------------------------------------------|--------|------|----------------------------------------------------------------------------------------|--------|------|
| Ba <sub>0.3</sub> Sr <sub>0.7</sub> Co <sub>0.8</sub> Fe <sub>0.2</sub> O <sub>3</sub>                    | 8      | 29   | La <sub>0.3</sub> Sr <sub>0.7</sub> Co <sub>0.5</sub> Ti <sub>0.5</sub> O <sub>3</sub>                     | 11     | 30   | LaSc <sub>0.95</sub> Mg <sub>0.05</sub> O <sub>3</sub>                                 | 9      | 16   |
| Ba <sub>0.3</sub> Sr <sub>0.7</sub> Zr <sub>0.44</sub> Ce <sub>0.36</sub> Y <sub>0.2</sub> O <sub>3</sub> | 4      |      | La <sub>0.3</sub> Sr <sub>0.7</sub> Co <sub>0.7</sub> Ti <sub>0.3</sub> O <sub>3</sub>                     | 11     | 30   | LaSc <sub>0.9</sub> Mg <sub>0.1</sub> O <sub>3</sub>                                   | 9      | 16   |
| Ba <sub>0.4</sub> Sr <sub>0.6</sub> Co <sub>0.8</sub> Fe <sub>0.2</sub> O <sub>3</sub>                    | 8      | 29   | La <sub>0.3</sub> Sr <sub>0.7</sub> TiO <sub>3</sub>                                                       | 11     | 30   | Nd <sub>0.4</sub> Sr <sub>0.6</sub> Co <sub>0.8</sub> Fe <sub>0.2</sub> O <sub>3</sub> | 9      | 27   |
| Ba <sub>0.5</sub> Sr <sub>0.5</sub> Co <sub>0.8</sub> Fe <sub>0.2</sub> O <sub>3</sub>                    | 8      | 29   | La <sub>0.4</sub> Sr <sub>0.6</sub> Co <sub>0.8</sub> Fe <sub>0.2</sub> O <sub>3</sub>                     | 9      | 27   | Nd <sub>0.9</sub> Sr <sub>0.1</sub> InO <sub>3</sub>                                   | 3      |      |
| Ba <sub>0.6</sub> Sr <sub>0.4</sub> Co <sub>0.8</sub> Fe <sub>0.2</sub> O <sub>3</sub>                    | 8      | 29   | La <sub>0.6</sub> Sr <sub>0.4</sub> Co <sub>0.2</sub> Fe <sub>0.8</sub> O <sub>3</sub>                     | 5      | 23   | Pr <sub>0.4</sub> Sr <sub>0.6</sub> Co <sub>0.8</sub> Fe <sub>0.2</sub> O <sub>3</sub> | 9      | 27   |
| Ba <sub>0.9</sub> Sr <sub>0.1</sub> Zr <sub>0.8</sub> Yb <sub>0.2</sub> O <sub>3</sub>                    | 2      |      | La <sub>0.6</sub> Sr <sub>0.4</sub> CoO <sub>3</sub>                                                       | 7      | 22   | Pr <sub>0.5</sub> Sr <sub>0.5</sub> Co <sub>0.2</sub> Mn <sub>0.8</sub> O <sub>3</sub> | 9      | 11   |
| BaCe <sub>0.16</sub> Zr <sub>0.84</sub> Y <sub>0.1</sub> Yb <sub>0.1</sub> O <sub>3</sub>                 | 3      |      | La <sub>0.75</sub> Sr <sub>0.25</sub> Cr <sub>0.5</sub> Mn <sub>0.5</sub> O <sub>3</sub>                   | 8      | 28   | Pr <sub>0.5</sub> Sr <sub>0.5</sub> Co <sub>0.4</sub> Mn <sub>0.6</sub> O <sub>3</sub> | 9      | 11   |
| BaCe <sub>0.45</sub> Zr <sub>0.35</sub> Y <sub>0.1</sub> Yb <sub>0.1</sub> O <sub>3</sub>                 | 3      |      | La <sub>0.75</sub> Sr <sub>0.25</sub> CrO <sub>3</sub>                                                     | 8      | 28   | Pr <sub>0.5</sub> Sr <sub>0.5</sub> Co <sub>0.6</sub> Mn <sub>0.4</sub> O <sub>3</sub> | 9      | 11   |
| BaCe <sub>0.6</sub> Zr <sub>0.2</sub> Y <sub>0.2</sub> O <sub>3</sub>                                     | 3      | 1    | La <sub>0.7</sub> Ba <sub>0.3</sub> CrO <sub>3</sub>                                                       | 8      | 28   | Pr <sub>0.5</sub> Sr <sub>0.5</sub> Co <sub>0.8</sub> Mn <sub>0.2</sub> O <sub>3</sub> | 9      | 11   |
| BaCe <sub>0.7</sub> Zr <sub>0.1</sub> Y <sub>0.1</sub> Yb <sub>0.1</sub> O <sub>3</sub>                   | 3      |      | La <sub>0.7</sub> Ca <sub>0.3</sub> CrO <sub>3</sub>                                                       | 8      | 28   | Pr <sub>0.5</sub> Sr <sub>0.5</sub> CoO <sub>3</sub>                                   | 9      | 11   |
| BaCe <sub>0.8</sub> Gd <sub>0.2</sub> O <sub>3</sub>                                                      | 5      | 14   | La <sub>0.7</sub> Sr <sub>0.3</sub> CrO <sub>3</sub>                                                       | 5      | 24   | Pr <sub>0.5</sub> Sr <sub>0.5</sub> MnO <sub>3</sub>                                   | 9      | 11   |
| BaCe <sub>0.8</sub> Y <sub>0.2</sub> O <sub>3</sub>                                                       | 3      |      | La <sub>0.7</sub> Sr <sub>0.3</sub> MnO <sub>3</sub>                                                       | 7      | 18   | Pr <sub>0.7</sub> Sr <sub>0.3</sub> Co <sub>0.2</sub> Mn <sub>0.8</sub> O <sub>3</sub> | 9      | 11   |
| BaCe <sub>0.9</sub> Y <sub>0.1</sub> O <sub>3</sub>                                                       | 1      |      | La <sub>0.85</sub> Ca <sub>0.15</sub> ScO <sub>3</sub>                                                     | 9      | 16   | Pr <sub>0.7</sub> Sr <sub>0.3</sub> Co <sub>0.4</sub> Mn <sub>0.6</sub> O <sub>3</sub> | 9      | 11   |
| BaPr <sub>0.6</sub> Gd <sub>0.4</sub> O <sub>3</sub>                                                      | 5      | 14   | La <sub>0.85</sub> Sr <sub>0.15</sub> CrO <sub>3</sub>                                                     | 5      | 24   | Pr <sub>0.7</sub> Sr <sub>0.3</sub> Co <sub>0.6</sub> Mn <sub>0.4</sub> O <sub>3</sub> | 9      | 11   |
| BaPr <sub>0.7</sub> Gd <sub>0.3</sub> O <sub>3</sub>                                                      | 5      | 14   | La <sub>0.8</sub> Ca <sub>0.2</sub> ScO <sub>3</sub>                                                       | 9      | 16   | Pr <sub>0.7</sub> Sr <sub>0.3</sub> Co <sub>0.8</sub> Mn <sub>0.2</sub> O <sub>3</sub> | 9      | 11   |
| BaPr <sub>0.8</sub> Gd <sub>0.2</sub> O <sub>3</sub>                                                      | 5      | 14   | La <sub>0.8</sub> Sr <sub>0.2</sub> CrO <sub>3</sub>                                                       | 5      | 24   | Pr <sub>0.7</sub> Sr <sub>0.3</sub> CoO <sub>3</sub>                                   | 9      | 11   |
| BaZr <sub>0.44</sub> Ce <sub>0.36</sub> Y <sub>0.2</sub> O <sub>3</sub>                                   | 2      |      | La <sub>0.8</sub> Sr <sub>0.2</sub> Ga <sub>0.8</sub> Mg <sub>0.15</sub> Ni <sub>0.05</sub> O <sub>3</sub> | 6      | 15   | Pr <sub>0.7</sub> Sr <sub>0.3</sub> MnO <sub>3</sub>                                   | 9      | 11   |
| BaZr <sub>0.4</sub> Pr <sub>0.4</sub> Y <sub>0.2</sub> O <sub>3</sub>                                     | 9      | 17   | La <sub>0.8</sub> Sr <sub>0.2</sub> Ga <sub>0.8</sub> Mg <sub>0.1</sub> Ni <sub>0.1</sub> O <sub>3</sub>   | 5      | 15   | Pr <sub>0.85</sub> Sr <sub>0.15</sub> CoO <sub>3</sub>                                 | 5      | 25   |
| BaZr <sub>0.5</sub> Pr <sub>0.3</sub> Y <sub>0.2</sub> O <sub>3</sub>                                     | 9      | 17   | La <sub>0.8</sub> Sr <sub>0.2</sub> Mn <sub>0.9</sub> Cu <sub>0.1</sub> O <sub>3</sub>                     | 11     | 19   | SrTi <sub>0.85</sub> Fe <sub>0.15</sub> O <sub>3</sub>                                 | 21     | 26   |
| BaZr <sub>0.6</sub> Pr <sub>0.2</sub> Y <sub>0.2</sub> O <sub>3</sub>                                     | 9      | 17   | La <sub>0.8</sub> Sr <sub>0.2</sub> MnO <sub>3</sub>                                                       | 12     | 21   | SrTi <sub>0.95</sub> Fe <sub>0.05</sub> O <sub>3</sub>                                 | 21     | 26   |
| BaZr <sub>0.7</sub> Pr <sub>0.1</sub> Y <sub>0.2</sub> O <sub>3</sub>                                     | 9      | 17   | La <sub>0.8</sub> Sr <sub>0.2</sub> Sc <sub>0.2</sub> Mn <sub>0.8</sub> O <sub>3</sub>                     | 12     | 21   | SrTi <sub>0.9</sub> Fe <sub>0.1</sub> O <sub>3</sub>                                   | 21     | 26   |
| BaZr <sub>0.7</sub> Yb <sub>0.2</sub> In <sub>0.1</sub> O <sub>3</sub>                                    | 3      |      | La <sub>0.95</sub> Ca <sub>0.05</sub> ScO <sub>3</sub>                                                     | 9      | 16   | Sm <sub>0.4</sub> Sr <sub>0.6</sub> Co <sub>0.8</sub> Fe <sub>0.2</sub> O <sub>3</sub> | 9      | 27   |
| BaZr <sub>0.7</sub> Yb <sub>0.2</sub> Sc <sub>0.1</sub> O <sub>3</sub>                                    | 1      |      | La <sub>0.9</sub> Ba <sub>0.1</sub> In <sub>0.9</sub> Sc <sub>0.1</sub> O <sub>3</sub>                     | 3      |      | Sm <sub>0.9</sub> Sr <sub>0.1</sub> InO <sub>3</sub>                                   | 3      |      |
| BaZr <sub>0.8</sub> In <sub>0.2</sub> O <sub>3</sub>                                                      | 3      | 2    | La <sub>0.9</sub> Ba <sub>0.1</sub> YbO <sub>3</sub>                                                       | 3      | 10   | SrCe <sub>0.97</sub> Yb <sub>0.03</sub> O <sub>3</sub>                                 | 7      |      |
| BaZr <sub>0.8</sub> Lu <sub>0.2</sub> O <sub>3</sub>                                                      | 3      | 2    | La <sub>0.9</sub> Ca <sub>0.1</sub> ScO <sub>3</sub>                                                       | 9      | 16   | SrCe <sub>0.9</sub> Sc <sub>0.05</sub> Gd <sub>0.05</sub> O <sub>3</sub>               | 3      |      |
| BaZr <sub>0.8</sub> Sc <sub>0.2</sub> O <sub>3</sub>                                                      | 3      | 2    | La <sub>0.9</sub> Sr <sub>0.1</sub> CoO <sub>3</sub>                                                       | 7      | 22   | SrCo <sub>0.85</sub> Nb <sub>0.15</sub> O <sub>3</sub>                                 | 9      | 12   |
| BaZr <sub>0.8</sub> Tm <sub>0.2</sub> O <sub>3</sub>                                                      | 3      | 2    | La <sub>0.9</sub> Sr <sub>0.1</sub> CrO <sub>3</sub>                                                       | 5      | 24   | SrCo <sub>0.8</sub> Nb <sub>0.2</sub> O <sub>3</sub>                                   | 9      | 12   |
| BaZr <sub>0.8</sub> Y <sub>0.2</sub> O <sub>3</sub>                                                       | 3      | 2    | La <sub>0.9</sub> Sr <sub>0.1</sub> ScO <sub>3</sub>                                                       | 3      | 7    | SrCo <sub>0.90</sub> Nb <sub>0.1</sub> O <sub>3</sub>                                  | 9      | 12   |
| BaZr <sub>0.8</sub> Yb <sub>0.2</sub> O <sub>3</sub>                                                      | 3      | 2    | La <sub>0.9</sub> Sr <sub>0.1</sub> Yb <sub>0.8</sub> In <sub>0.2</sub> O <sub>3</sub>                     | 1      | 9    | SrCo <sub>0.95</sub> Nb <sub>0.05</sub> O <sub>3</sub>                                 | 9      | 12   |
| Gd <sub>0.4</sub> Sr <sub>0.6</sub> Co <sub>0.8</sub> Fe <sub>0.2</sub> O <sub>3</sub>                    | 9      | 27   | LaFe <sub>0.6</sub> Ni <sub>0.4</sub> O <sub>3</sub>                                                       | 11     | 20   | SrZr <sub>0.3</sub> Ce <sub>0.6</sub> Y <sub>0.1</sub> O <sub>3</sub>                  | 1      | 5    |
| Gd <sub>0.8</sub> Ca <sub>0.2</sub> CoO <sub>3</sub>                                                      | 6      | 13   | LaFe <sub>0.7</sub> Ni <sub>0.3</sub> O <sub>3</sub>                                                       | 11     | 20   | SrZr <sub>0.5</sub> Ce <sub>0.4</sub> Y <sub>0.1</sub> O <sub>3</sub>                  | 2      | 5    |
| Gd <sub>0.9</sub> Ca <sub>0.1</sub> CoO <sub>3</sub>                                                      | 6      | 13   | LaFe <sub>0.8</sub> Ni <sub>0.2</sub> O <sub>3</sub>                                                       | 11     | 20   | SrZr <sub>0.8</sub> Sc <sub>0.2</sub> O <sub>3</sub>                                   | 3      |      |
| La <sub>0.1</sub> Sr <sub>0.9</sub> TiO <sub>3</sub>                                                      | 11     | 30   | LaFe <sub>0.9</sub> Ni <sub>0.1</sub> O <sub>3</sub>                                                       | 7      | 20   | SrZr <sub>0.9</sub> Y <sub>0.1</sub> O <sub>3</sub>                                    | 1      | 5    |
| La <sub>0.2</sub> Sr <sub>0.8</sub> TiO <sub>3</sub>                                                      | 11     | 30   | LaSc <sub>0.85</sub> Mg <sub>0.15</sub> O <sub>3</sub>                                                     | 9      | 16   |                                                                                        |        |      |
| La <sub>0.3</sub> Sr <sub>0.7</sub> Co <sub>0.3</sub> Ti <sub>0.7</sub> O <sub>3</sub>                    | 11     | 30   | LaSc <sub>0.8</sub> Mg <sub>0.2</sub> O <sub>3</sub>                                                       | 9      | 16   |                                                                                        |        |      |
|                                                                                                           |        |      |                                                                                                            |        |      | total                                                                                  | 738    |      |

## Descriptors for Machine Learning

The 80 descriptors used in the machine learning model are listed below. They include the atomic weight,  $w$ , atomic density,  $\rho$ , melting temperature,  $T_m$ , first ionization energy,  $E_{1st}$ , electronegativity,  $\chi$ , ionic radius,  $r$ , of the composed elements, where the values are divided or subtracted from one another and averaged over the A-site, B-site, and entire  $ABO_3$  compound.

- 1) Temperature,  $T$
- 2) Water partial pressure,  $p_{H_2O}$
- 3) Sintering temperature,  $T_{sinter}$
- 4) Sintering time,  $t_{sinter}$
- 5) Product of descriptors 3) and 4)
- 6) Formula weight of perovskite oxides,  $M_w$
- 7) Tolerance factor
- 8) Weighted average of  $w$ ,  $\rho$ ,  $T_m$ ,  $E_{1st}$ ,  $\chi$  and  $r$  of A-site elements with its fraction in the A-site
- 9) Weighted average of  $w$ ,  $\rho$ ,  $T_m$ ,  $E_{1st}$ ,  $\chi$  and  $r$  of B-site elements with its fraction in the B-site
- 10) Weighted average of  $w$ ,  $\rho$ ,  $T_m$ ,  $E_{1st}$ ,  $\chi$  and  $r$  of dopant elements with its composition in perovskite
- 11) Weighted average of  $w$ ,  $\rho$ ,  $T_m$ ,  $E_{1st}$ ,  $\chi$  and  $r$  of A-site host elements with its composition in perovskite
- 12) Weighted average of  $w$ ,  $\rho$ ,  $T_m$ ,  $E_{1st}$ ,  $\chi$  and  $r$  of B-site host elements with its composition in perovskite
- 13) Sum of descriptors 11) and 12) for each  $w$ ,  $\rho$ ,  $T_m$ ,  $E_{1st}$ ,  $\chi$  and  $r$
- 14) Ratio of descriptors 8) to 9) for each  $w$ ,  $\rho$ ,  $T_m$ ,  $E_{1st}$ ,  $\chi$  and  $r$
- 15) Ratio of descriptors 12) to 11) for each  $w$ ,  $\rho$ ,  $T_m$ ,  $E_{1st}$ ,  $\chi$  and  $r$
- 16) Ratio of descriptors 10) to 11) for each  $w$ ,  $\rho$ ,  $T_m$ ,  $E_{1st}$ ,  $\chi$  and  $r$
- 17) Ratio of descriptors 10) to 12) for each  $w$ ,  $\rho$ ,  $T_m$ ,  $E_{1st}$ ,  $\chi$  and  $r$
- 18) Ratio of descriptors 10) to 13) for each  $w$ ,  $\rho$ ,  $T_m$ ,  $E_{1st}$ ,  $\chi$  and  $r$
- 19) Chemical composition of A-site dopant
- 20) Chemical composition of B-site dopant
- 21) Sum of descriptors 19) and 20)
- 22) Chemical composition of A-site host element
- 23) Chemical composition of B-site host element
- 24) Sum of descriptors 22) and 23)
- 25)  $M_w (r_A r_B)^{-1/2}$

The “dopant” was defined as an acceptor whose valence is lower than that of the host element. In the case of  $La_{0.9}^{3+}Sr_{0.1}^{2+}Yb_{0.5}^{3+}Y_{0.5}^{3+}O_{3-\delta}^{2-}$ , for example, only Sr is considered as the dopant. We assumed the

valence of Nd (+2 or +3) and Yb (+2 or +3) cations to be +3. The Goldschmidt tolerance factor [31] was defined as  $(r_A + r_O) / \{\sqrt{2}(r_B + r_O)\}$ , where  $r_A$ ,  $r_B$ , and  $r_O$  denote the Shannon ionic radii [32] of A-site cations, B-site cations, and oxygen ions, respectively. The descriptor 25) roughly expresses the theoretical density of perovskite oxides.

## X-ray diffraction analysis

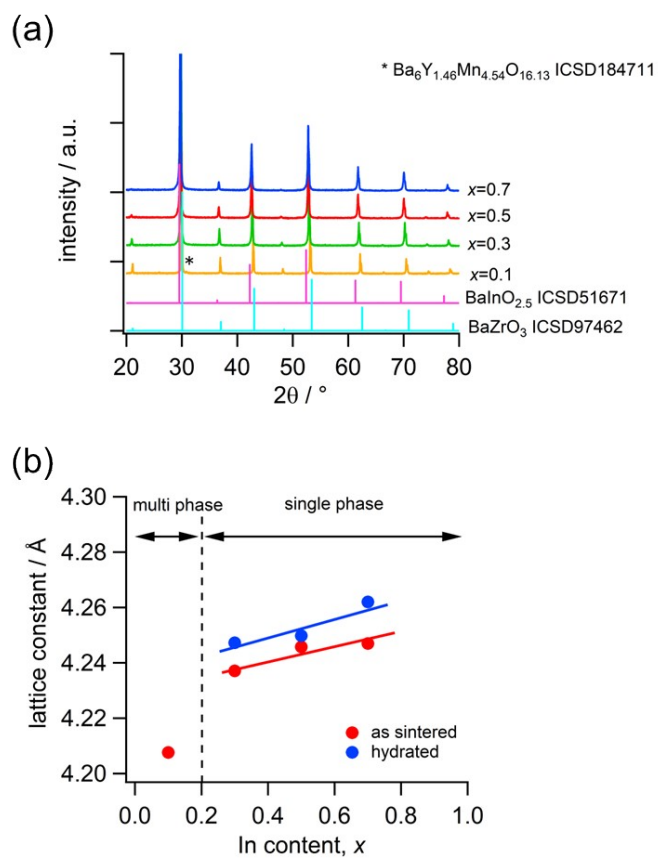

Figure S2 X-ray diffraction analysis. (a) X-ray diffraction pattern, (b) lattice constant.

## X-ray Photoelectron Spectroscopy analysis

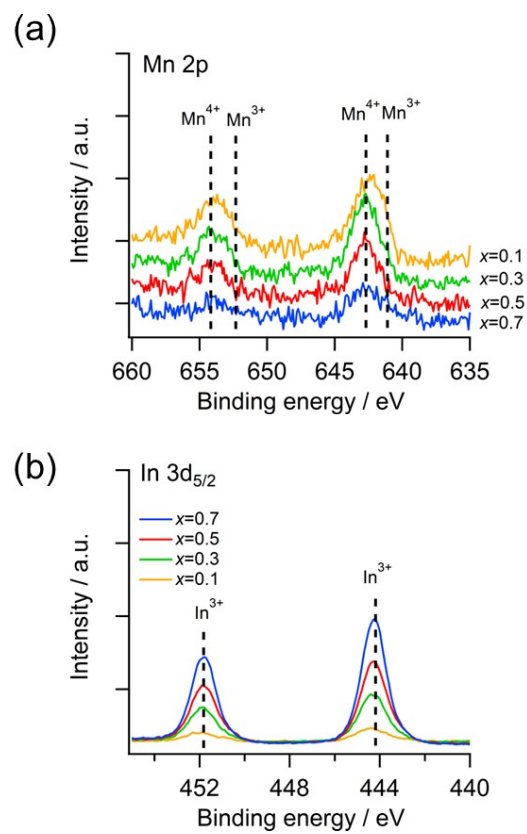

Figure S3 X-ray Photoelectron Spectroscopy analysis. (a) Mn 2p spectrum, (b) In 3d spectrum.

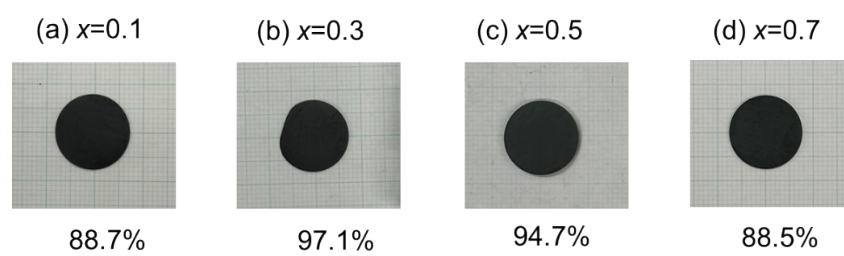

Figure S4 Photograph of samples. (a) $x=0.1$ , (b) $x=0.3$ , (c) $x=0.5$ , (d) $x=0.7$ .

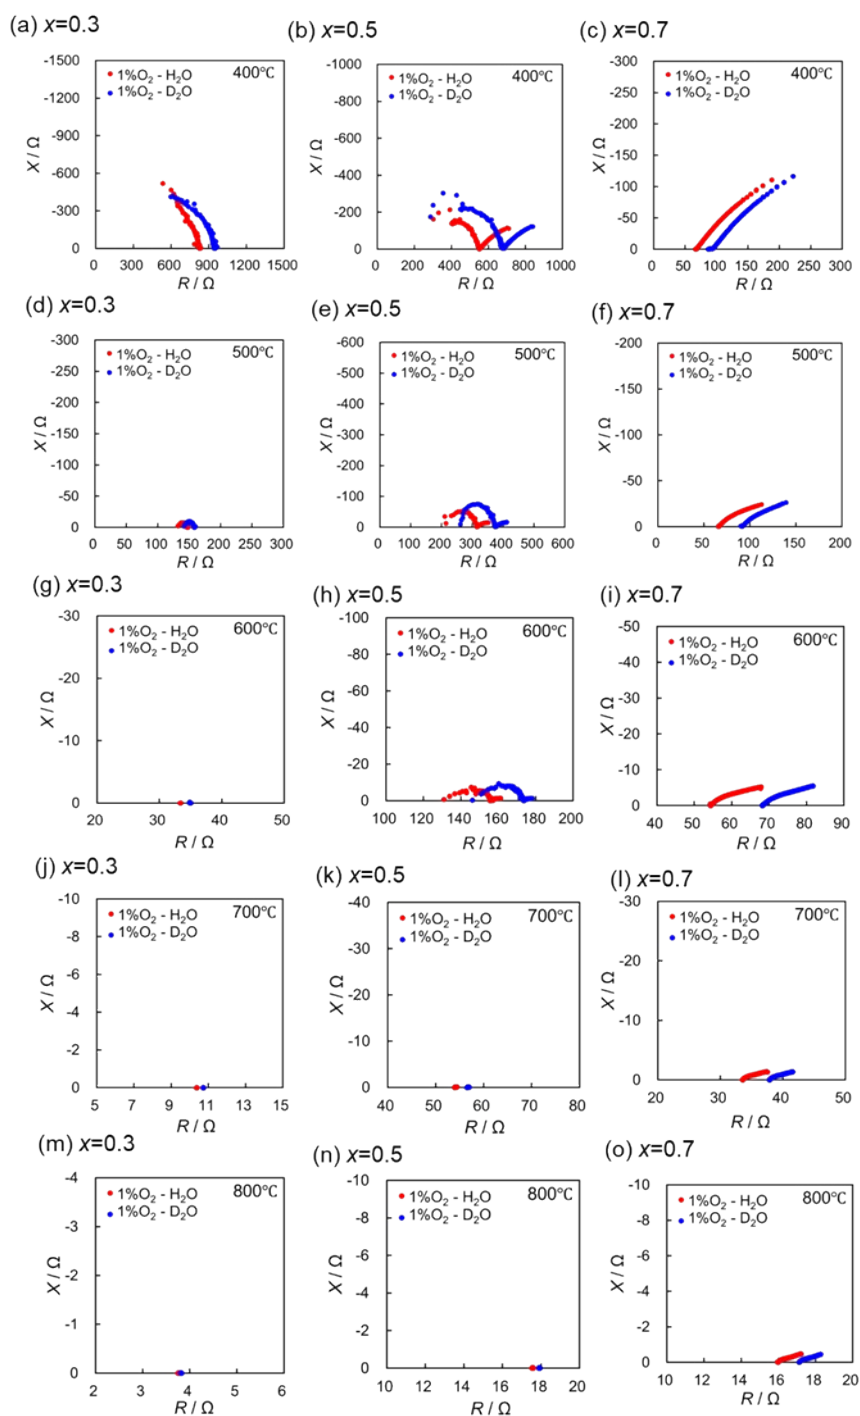

Figure S5 Nyquist plot of the sample for each temperature. (a)(b)(c)400°C, (d)(e)(f)500°C, (g)(h)(i)600°C, (j)(k)(l)700°C, (m)(n)(o)800°C.

## References

- [1] Y. Okuyama, N. Ebihara, K. Okuyama, Y. Mizutani, Improvement of proton Ceramic Fuel Cells with Thin Film BCZY Electrolyte, ECS Transaction, 68(2015)2545-2553.
- [2] T. Kuroha, Y. Niina, M. Shudo, G. Sakai, N. Matsunaga, T. Goto, K. Yamauchi, Y. Mikami, and Y. Okuyama, Optimum dopant of barium zirconate electrolyte for manufacturing of protonic ceramic fuel cells, Journal of power sources, 506 (2021) 230134
- [3] J. Bao, N. Kurita, Y. Okuyama, Z. Shi, N. Fukatsu, Properties of Electric Conductivity in Y-Doped  $\text{CaZrO}_3$ , Materials Transactions 53(5) (2012)973-979. (
- [4] J. Bao, H. Ohno, N. Kurita, Y. Okuyama, N. Fukatsu, Proton conduction in Al-doped  $\text{CaZrO}_3$ , Electrochimica Acta (2011) 1062-1068
- [5] Y. Okuyama, K. Isa, Y.S. Lee, T. Sakai, H. Matsumoto, Incorporation and conduction of proton in  $\text{SrCe}_{0.9-x}\text{Zr}_x\text{Y}_{0.1}\text{O}_{3-\delta}$ , Solid State Ionics 275(2015)35-38
- [6] Y. Okuyama, Development of defect-structure-type proton conductors and their application to sensors and fuel cells, JSAP Rev. 2024, 240207
- [7] Y. Okuyama, T. Kozai, S. Ikeda, M. Matsuka, T. Sakai, H. Matsumoto, Incorporation and conduction of proton in Sr-doped  $\text{LaMO}_3$  (M=Al, Sc, In, Yb, Y) Electrochimica Acta, 125(2014)443-449.
- [8] Y. Okuyama, S. Ikeda, T. Sakai and H. Matsumoto, Incorporation of a proton into  $\text{La}_{0.9}\text{Sr}_{0.1}(\text{Yb}_{1-x}\text{M}_x)\text{O}_{3-\delta}$  (M= Y, In), Solid State Ionics 262(2014)865-869.
- [9] Y. Okuyama, K. Okuyama, Y. Mizutani, T. Sakai, Y.S. Lee, H. Matsumoto, Proton transport properties of  $\text{La}_{0.9}\text{Sr}_{0.1}\text{Yb}_{0.8}\text{In}_{0.2}\text{O}_{3-\delta}$  and its application to proton ceramic fuel cell, International of Hydrogen Energy 39(2014)20829-20836
- [10] Y. Okuyama, T. Kozai, T. Sakai, M. Matsuka, H. Matsumoto, Proton transport properties of  $\text{La}_{0.9}\text{M}_{0.1}\text{YbO}_{3-\delta}$  (M=Ba, Sr, Ca, Mg), Electrochimica acta 95(2013)54-59.
- [11] G.Ch. Kostoglou, P. Fertis, Ch. Ftikos, Electronic conductivity in the  $\text{Pr}_{1-x}\text{Sr}_x\text{Co}_{1-y}\text{Mn}_y\text{O}_{3-\delta}$  system, Solid State Ionics, Volume 118, Issues 3–4, 1999, Pages 241-249
- [12] Fang Wang, Qingjun Zhou, Tianmin He, Guodong Li, Hong Ding, Novel  $\text{SrCo}_{1-y}\text{Nb}_y\text{O}_{3-\delta}$  cathodes for intermediate-temperature solid oxide fuel cells, Journal of Power Sources, Volume 195, Issue 12, 2010, Pages 3772-3778

- [13] □ Ji-Woong Moon, Yoshitake Masuda, Won-Seon Seo, Kunihito Koumoto, Influence of ionic size of rare-earth site on the thermoelectric properties of  $\text{RCoO}_3$ -type perovskite cobalt oxides, *Materials Science and Engineering: B*, Volume 85, Issue 1, 2001, Pages 70-75
- [14] □ Takehisa Fukui, Satoshi Ohara, Shigeyuki Kawatsu, Conductivity of  $\text{BaPrO}_3$  based perovskite oxides, *Journal of Power Sources*, Volume 71, Issues 1–2, 1998, Pages 164-168
- [15] □ Ishihara, T., Shibayama, T., Nishiguchi, H. et al. Oxide ion conductivity in  $\text{La}_{0.8}\text{Sr}_{0.2}\text{Ga}_{0.8}\text{Mg}_{0.2-x}\text{Ni}_x\text{O}_3$  perovskite oxide and application for the electrolyte of solid oxide fuel cells. *Journal of Materials Science* 36, 1125–1131 (2001).
- [16] □ Fujii, H., Katayama, Y., Shimura, T., & Iwahara, H. (1998). Protonic Conduction in Perovskite-type Oxide Ceramics Based on  $\text{LnScO}_3$  ( $\text{Ln}=\text{La, Nd, Sm or Gd}$ ) at High Temperature. *Journal of Electroceramics*, 2(2), 119–125. <https://doi.org/10.1023/A:1009935208872>
- [17] □ Emiliana Fabbri, Isaac Markus, Lei Bi, Daniele Pergolesi, Enrico Traversa, Tailoring mixed proton-electronic conductivity of  $\text{BaZrO}_3$  by Y and Pr co-doping for cathode application in protonic SOFCs, *Solid State Ionics*, Volume 202, Issue 1, 2011, Pages 30-35
- [18] □ S. Paydar, M.H. Shariat, S. Javadpour, Investigation on electrical conductivity of LSM/YSZ8, LSM/ $\text{Ce}_{0.84}\text{Y}_{0.16}\text{O}_{0.96}$  and LSM/ $\text{Ce}_{0.42}\text{Zr}_{0.42}\text{Y}_{0.16}\text{O}_{0.96}$  composite cathodes of SOFCs, *International Journal of Hydrogen Energy*, Volume 41, Issue 48, 2016, Pages 23145-23155
- [19] □ Taimin Noh, Jiseung Ryu, Jinseong Kim, Yong-Nam Kim, Heesoo Lee, Structural and impedance analysis of copper doped LSM cathode for IT-SOFCs, *Journal of Alloys and Compounds*, Volume 557, 2013, Pages 196-201
- [20] □ Reichi Chiba, Fumikatsu Yoshimura, Yoji Sakurai, An investigation of  $\text{LaNi}_{1-x}\text{Fe}_x\text{O}_3$  as a cathode material for solid oxide fuel cells, *Solid State Ionics*, Volume 124, Issues 3–4, 1999, Pages 281-288
- [21] □ Yao Zheng, Chunming Zhang, Ran Ran, Rui Cai, Zongping Shao, D. Farrusseng, A new symmetric solid-oxide fuel cell with  $\text{La}_{0.8}\text{Sr}_{0.2}\text{Sc}_{0.2}\text{Mn}_{0.8}\text{O}_{3-\delta}$  perovskite oxide as both the anode and cathode, *Acta Materialia*, Volume 57, Issue 4, 2009, Pages 1165-1175
- [22] □ Panpailin Seeharaj, Andrey Berenov, Edwin Raj, Robert Rudkin, Alan Atkinson, Mixed-conducting LSC/CGO composites for passive oxygen separation membranes, *Solid State Ionics*, Volume 192, Issue 1, 2011, Pages 638-641

- [23] □ Ali Zomorrodian, Hadi Salamati, Zigui Lu, Xin Chen, Naijuan Wu, Alex Ignatiev, Electrical conductivity of epitaxial  $\text{La}_{0.6}\text{Sr}_{0.4}\text{Co}_{0.2}\text{Fe}_{0.8}\text{O}_{3-\delta}$  thin films grown by pulsed laser deposition, *International Journal of Hydrogen Energy*, Volume 35, Issue 22, 2010, Pages 12443-12448
- [24] □ Yong-Jie Yang, Ting-Lian Wen, Hengyong Tu, Da-Qian Wang, Jianhua Yang, Characteristics of lanthanum strontium chromite prepared by glycine nitrate process, *Solid State Ionics*, Volume 135, Issues 1–4, 2000, Pages 475-479
- [25] □ G.Ch. Kostogloudis, N. Vasilakos, Ch. Ftikos, Crystal structure, thermal and electrical properties of  $\text{Pr}_{1-x}\text{Sr}_x\text{CoO}_{3-\delta}$  ( $x=0, 0.15, 0.3, 0.4, 0.5$ ) perovskite oxides, *Solid State Ionics*, Volume 106, Issues 3–4, 1998, Pages 207-218
- [26] □ Xiuling Yu, Wen Long, Fangjun Jin, Tianmin He, Cobalt-free perovskite cathode materials  $\text{SrFe}_{1-x}\text{Ti}_x\text{O}_{3-\delta}$  and performance optimization for intermediate-temperature solid oxide fuel cells, *Electrochimica Acta*, Volume 123, 2014, Pages 426-434
- [27] □ H.Y Tu, Y Takeda, N Imanishi, O Yamamoto,  $\text{Ln}_{0.4}\text{Sr}_{0.6}\text{Co}_{0.8}\text{Fe}_{0.2}\text{O}_{3-\delta}$  ( $\text{Ln}=\text{La, Pr, Nd, Sm, Gd}$ ) for the electrode in solid oxide fuel cells, *Solid State Ionics*, Volume 117, Issues 3–4, 1999, Pages 277-281
- [28] □ San Ping Jiang, Li Liu, Khuong P. Ong, Ping Wu, Jian Li, Jian Pu, Electrical conductivity and performance of doped  $\text{LaCrO}_3$  perovskite oxides for solid oxide fuel cells, *Journal of Power Sources*, Volume 176, Issue 1, 2008, Pages 82-89
- [29] □ Bo Wei, Zhe Lü, Xiqiang Huang, Jipeng Miao, Xueqing Sha, Xianshuang Xin, Wenhui Su, Crystal structure, thermal expansion and electrical conductivity of perovskite oxides  $\text{Ba}_x\text{Sr}_{1-x}\text{Co}_{0.8}\text{Fe}_{0.2}\text{O}_{3-\delta}$  ( $0.3 \leq x \leq 0.7$ ), *Journal of the European Ceramic Society*, Volume 26, Issue 13, 2006, Pages 2827-2832
- [30] □ Xue Li, Hailei Zhao, Nansheng Xu, Xiong Zhou, Cuijuan Zhang, Ning Chen, Electrical conduction behavior of La, Co co-doped  $\text{SrTiO}_3$  perovskite as anode material for solid oxide fuel cells, *International Journal of Hydrogen Energy*, Volume 34, Issue 15, 2009, Pages 6407-6414
- [31] Reaney, I. M.; Colla, E. L.; Setter, N., Dielectric and Structural Characteristics of Ba- and Sr-based Complex Perovskites as a Function of Tolerance Factor. *Jpn. J. Appl. Phys.* 1994, 33, 3984-3990.

[32] Shannon, R. D., Revised Effective Ionic Radii and Systematic Studies of Interatomic Distances in Halides and Chalcogenides. *Acta Cryst.* 1976, A32, 751-767.
