# Supplementary material
Source: Royal Society of Chemistry journal article supplement (doi:10.1039/d6ma00607h)
Supplement: d6ma00607h2.pdf [file d6ma00607h2.pdf]

| proton conductivity |                                                          |                                 |            |           |           |                     |                      |        |
|---------------------|----------------------------------------------------------|---------------------------------|------------|-----------|-----------|---------------------|----------------------|--------|
|                     | Composition                                              | impedance measurement condition |            |           |           | sintering condition |                      |        |
|                     |                                                          | T/K                             | $p_{H_2O}$ | $p_{H_2}$ | $p_{O_2}$ | sintering temp. / K | sintering atmosphere | method |
| 1                   | CaZr <sub>0.96</sub> In <sub>0.04</sub> O <sub>3</sub>   | 873                             | 0.01       | 0.1       |           | 1873                | air                  | SSR    |
| 1                   | CaZr <sub>0.96</sub> In <sub>0.04</sub> O <sub>3</sub>   | 923                             | 0.01       | 0.1       |           | 1873                | air                  | SSR    |
| 1                   | CaZr <sub>0.96</sub> In <sub>0.04</sub> O <sub>3</sub>   | 973                             | 0.01       | 0.1       |           | 1873                | air                  | SSR    |
| 1                   | CaZr <sub>0.96</sub> In <sub>0.04</sub> O <sub>3</sub>   | 1023                            | 0.01       | 0.1       |           | 1873                | air                  | SSR    |
| 1                   | CaZr <sub>0.96</sub> In <sub>0.04</sub> O <sub>3</sub>   | 1073                            | 0.01       | 0.1       |           | 1873                | air                  | SSR    |
| 1                   | CaZr <sub>0.96</sub> In <sub>0.04</sub> O <sub>3</sub>   | 1123                            | 0.01       | 0.1       |           | 1873                | air                  | SSR    |
| 1                   | CaZr <sub>0.96</sub> In <sub>0.04</sub> O <sub>3</sub>   | 1173                            | 0.01       | 0.1       |           | 1873                | air                  | SSR    |
| 1                   | CaZr <sub>0.96</sub> In <sub>0.04</sub> O <sub>3</sub>   | 1273                            | 0.01       | 0.1       |           | 1873                | air                  | SSR    |
| 2                   | CaZr <sub>0.96</sub> Yb <sub>0.04</sub> O <sub>3</sub>   | 873                             | 0.01       |           | 0.01      | 1873                | air                  | SSR    |
| 2                   | CaZr <sub>0.96</sub> Yb <sub>0.04</sub> O <sub>3</sub>   | 973                             | 0.01       |           | 0.01      | 1873                | air                  | SSR    |
| 2                   | CaZr <sub>0.96</sub> Yb <sub>0.04</sub> O <sub>3</sub>   | 1073                            | 0.01       |           | 0.01      | 1873                | air                  | SSR    |
| 3                   | CaZr <sub>0.95</sub> Y <sub>0.05</sub> O <sub>3</sub>    | 1073                            | 0.019      | 0.01      |           | 1873                | air                  | CS     |
| 3                   | CaZr <sub>0.95</sub> Y <sub>0.05</sub> O <sub>3</sub>    | 973                             | 0.019      | 0.01      |           | 1873                | air                  | CS     |
| 3                   | CaZr <sub>0.95</sub> Y <sub>0.05</sub> O <sub>3</sub>    | 873                             | 0.019      | 0.01      |           | 1873                | air                  | CS     |
| 4                   | CaZr <sub>0.995</sub> Al <sub>0.005</sub> O <sub>3</sub> | 473                             | 0.01       | 0.01      |           | 1873                | air                  | SSR    |
| 4                   | CaZr <sub>0.995</sub> Al <sub>0.005</sub> O <sub>3</sub> | 573                             | 0.01       | 0.01      |           | 1873                | air                  | SSR    |
| 4                   | CaZr <sub>0.995</sub> Al <sub>0.005</sub> O <sub>3</sub> | 673                             | 0.01       | 0.01      |           | 1873                | air                  | SSR    |
| 4                   | CaZr <sub>0.995</sub> Al <sub>0.005</sub> O <sub>3</sub> | 773                             | 0.01       | 0.01      |           | 1873                | air                  | SSR    |
| 4                   | CaZr <sub>0.995</sub> Al <sub>0.005</sub> O <sub>3</sub> | 873                             | 0.01       | 0.01      |           | 1873                | air                  | SSR    |
| 4                   | CaZr <sub>0.995</sub> Al <sub>0.005</sub> O <sub>3</sub> | 923                             | 0.01       | 0.01      |           | 1873                | air                  | SSR    |
| 4                   | CaZr <sub>0.995</sub> Al <sub>0.005</sub> O <sub>3</sub> | 973                             | 0.01       | 0.01      |           | 1873                | air                  | SSR    |
| 4                   | CaZr <sub>0.995</sub> Al <sub>0.005</sub> O <sub>3</sub> | 1023                            | 0.01       | 0.01      |           | 1873                | air                  | SSR    |
| 4                   | CaZr <sub>0.995</sub> Al <sub>0.005</sub> O <sub>3</sub> | 1073                            | 0.01       | 0.01      |           | 1873                | air                  | SSR    |
| 4                   | CaZr <sub>0.995</sub> Al <sub>0.005</sub> O <sub>3</sub> | 1123                            | 0.01       | 0.01      |           | 1873                | air                  | SSR    |
| 4                   | CaZr <sub>0.995</sub> Al <sub>0.005</sub> O <sub>3</sub> | 1173                            | 0.01       | 0.01      |           | 1873                | air                  | SSR    |
| 4                   | CaZr <sub>0.995</sub> Al <sub>0.005</sub> O <sub>3</sub> | 1273                            | 0.01       | 0.01      |           | 1873                | air                  | SSR    |
| 5                   | BaZr <sub>0.8</sub> Sc <sub>0.2</sub> O <sub>3</sub>     | 573                             | 0.019      | 0.01      |           | 1873                | O <sub>2</sub>       | CS     |
| 5                   | BaZr <sub>0.8</sub> Sc <sub>0.2</sub> O <sub>3</sub>     | 673                             | 0.019      | 0.01      |           | 1873                | O <sub>2</sub>       | CS     |
| 5                   | BaZr <sub>0.8</sub> Sc <sub>0.2</sub> O <sub>3</sub>     | 873                             | 0.019      | 0.01      |           | 1873                | O <sub>2</sub>       | CS     |
| 5                   | BaZr <sub>0.8</sub> Sc <sub>0.2</sub> O <sub>3</sub>     | 973                             | 0.019      | 0.01      |           | 1873                | O <sub>2</sub>       | CS     |
| 5                   | BaZr <sub>0.8</sub> Sc <sub>0.2</sub> O <sub>3</sub>     | 1073                            | 0.019      | 0.01      |           | 1873                | O <sub>2</sub>       | CS     |
| 5                   | BaZr <sub>0.8</sub> Sc <sub>0.2</sub> O <sub>3</sub>     | 662                             | 0.023      |           |           | 1873                | O <sub>2</sub>       | CS     |
| 5                   | BaZr <sub>0.8</sub> Sc <sub>0.2</sub> O <sub>3</sub>     | 643                             | 0.023      |           |           | 1873                | O <sub>2</sub>       | CS     |
| 5                   | BaZr <sub>0.8</sub> Sc <sub>0.2</sub> O <sub>3</sub>     | 626                             | 0.023      |           |           | 1873                | O <sub>2</sub>       | CS     |
| 5                   | BaZr <sub>0.8</sub> Sc <sub>0.2</sub> O <sub>3</sub>     | 609                             | 0.023      |           |           | 1873                | O <sub>2</sub>       | CS     |
| 5                   | BaZr <sub>0.8</sub> Sc <sub>0.2</sub> O <sub>3</sub>     | 591                             | 0.023      |           |           | 1873                | O <sub>2</sub>       | CS     |
| 5                   | BaZr <sub>0.8</sub> Sc <sub>0.2</sub> O <sub>3</sub>     | 574                             | 0.023      |           |           | 1873                | O <sub>2</sub>       | CS     |
| 5                   | BaZr <sub>0.8</sub> Sc <sub>0.2</sub> O <sub>3</sub>     | 564                             | 0.023      |           |           | 1873                | O <sub>2</sub>       | CS     |
| 5                   | BaZr <sub>0.8</sub> Sc <sub>0.2</sub> O <sub>3</sub>     | 550                             | 0.023      |           |           | 1873                | O <sub>2</sub>       | CS     |
| 5                   | BaZr <sub>0.8</sub> Sc <sub>0.2</sub> O <sub>3</sub>     | 539                             | 0.023      |           |           | 1873                | O <sub>2</sub>       | CS     |
| 5                   | BaZr <sub>0.8</sub> Sc <sub>0.2</sub> O <sub>3</sub>     | 528                             | 0.023      |           |           | 1873                | O <sub>2</sub>       | CS     |
| 5                   | BaZr <sub>0.8</sub> Sc <sub>0.2</sub> O <sub>3</sub>     | 517                             | 0.023      |           |           | 1873                | O <sub>2</sub>       | CS     |
| 5                   | BaZr <sub>0.8</sub> Sc <sub>0.2</sub> O <sub>3</sub>     | 504                             | 0.023      |           |           | 1873                | O <sub>2</sub>       | CS     |
| 5                   | BaZr <sub>0.8</sub> Sc <sub>0.2</sub> O <sub>3</sub>     | 493                             | 0.023      |           |           | 1873                | O <sub>2</sub>       | CS     |
| 5                   | BaZr <sub>0.8</sub> Sc <sub>0.2</sub> O <sub>3</sub>     | 481                             | 0.023      |           |           | 1873                | O <sub>2</sub>       | CS     |
| 5                   | BaZr <sub>0.8</sub> Sc <sub>0.2</sub> O <sub>3</sub>     | 471                             | 0.023      |           |           | 1873                | O <sub>2</sub>       | CS     |
| 5                   | BaZr <sub>0.8</sub> Sc <sub>0.2</sub> O <sub>3</sub>     | 458                             | 0.023      |           |           | 1873                | O <sub>2</sub>       | CS     |
| 5                   | BaZr <sub>0.8</sub> Sc <sub>0.2</sub> O <sub>3</sub>     | 446                             | 0.023      |           |           | 1873                | O <sub>2</sub>       | CS     |
| 5                   | BaZr <sub>0.8</sub> Sc <sub>0.2</sub> O <sub>3</sub>     | 437                             | 0.023      |           |           | 1873                | O <sub>2</sub>       | CS     |
| 5                   | BaZr <sub>0.8</sub> Sc <sub>0.2</sub> O <sub>3</sub>     | 426                             | 0.023      |           |           | 1873                | O <sub>2</sub>       | CS     |
| 5                   | BaZr <sub>0.8</sub> Sc <sub>0.2</sub> O <sub>3</sub>     | 415                             | 0.023      |           |           | 1873                | O <sub>2</sub>       | CS     |
| 5                   | BaZr <sub>0.8</sub> Sc <sub>0.2</sub> O <sub>3</sub>     | 404                             | 0.023      |           |           | 1873                | O <sub>2</sub>       | CS     |
| 5                   | BaZr <sub>0.8</sub> Sc <sub>0.2</sub> O <sub>3</sub>     | 394                             | 0.023      |           |           | 1873                | O <sub>2</sub>       | CS     |
| 5                   | BaZr <sub>0.8</sub> Sc <sub>0.2</sub> O <sub>3</sub>     | 383                             | 0.023      |           |           | 1873                | O <sub>2</sub>       | CS     |
| 5                   | BaZr <sub>0.8</sub> Sc <sub>0.2</sub> O <sub>3</sub>     | 373                             | 0.023      |           |           | 1873                | O <sub>2</sub>       | CS     |
| 5                   | BaZr <sub>0.8</sub> Sc <sub>0.2</sub> O <sub>3</sub>     | 361                             | 0.023      |           |           | 1873                | O <sub>2</sub>       | CS     |
| 6                   | BaZr <sub>0.8</sub> In <sub>0.2</sub> O <sub>3</sub>     | 573                             | 0.019      | 0.01      |           | 1873                | O <sub>2</sub>       | CS     |
| 6                   | BaZr <sub>0.8</sub> In <sub>0.2</sub> O <sub>3</sub>     | 673                             | 0.019      | 0.01      |           | 1873                | O <sub>2</sub>       | CS     |
| 6                   | BaZr <sub>0.8</sub> In <sub>0.2</sub> O <sub>3</sub>     | 873                             | 0.019      | 0.01      |           | 1873                | O <sub>2</sub>       | CS     |
| 6                   | BaZr <sub>0.8</sub> In <sub>0.2</sub> O <sub>3</sub>     | 973                             | 0.019      | 0.01      |           | 1873                | O <sub>2</sub>       | CS     |
| 6                   | BaZr <sub>0.8</sub> In <sub>0.2</sub> O <sub>3</sub>     | 1073                            | 0.019      | 0.01      |           | 1873                | O <sub>2</sub>       | CS     |

SSR: Solid state reaction

CS: Chemical solution



|   |                                                      |          |       |      |  |      |    |    |
|---|------------------------------------------------------|----------|-------|------|--|------|----|----|
| 8 | BaZr <sub>0.8</sub> Er <sub>0.2</sub> O <sub>3</sub> | 679      | 0.023 |      |  | 1873 | O2 | CS |
| 8 | BaZr <sub>0.8</sub> Er <sub>0.2</sub> O <sub>3</sub> | 662      | 0.023 |      |  | 1873 | O2 | CS |
| 8 | BaZr <sub>0.8</sub> Er <sub>0.2</sub> O <sub>3</sub> | 643      | 0.023 |      |  | 1873 | O2 | CS |
| 8 | BaZr <sub>0.8</sub> Er <sub>0.2</sub> O <sub>3</sub> | 626      | 0.023 |      |  | 1873 | O2 | CS |
| 8 | BaZr <sub>0.8</sub> Er <sub>0.2</sub> O <sub>3</sub> | 609      | 0.023 |      |  | 1873 | O2 | CS |
| 8 | BaZr <sub>0.8</sub> Er <sub>0.2</sub> O <sub>3</sub> | 591      | 0.023 |      |  | 1873 | O2 | CS |
| 8 | BaZr <sub>0.8</sub> Er <sub>0.2</sub> O <sub>3</sub> | 574      | 0.023 |      |  | 1873 | O2 | CS |
| 8 | BaZr <sub>0.8</sub> Er <sub>0.2</sub> O <sub>3</sub> | 564      | 0.023 |      |  | 1873 | O2 | CS |
| 8 | BaZr <sub>0.8</sub> Er <sub>0.2</sub> O <sub>3</sub> | 550      | 0.023 |      |  | 1873 | O2 | CS |
| 8 | BaZr <sub>0.8</sub> Er <sub>0.2</sub> O <sub>3</sub> | 539      | 0.023 |      |  | 1873 | O2 | CS |
| 8 | BaZr <sub>0.8</sub> Er <sub>0.2</sub> O <sub>3</sub> | 528      | 0.023 |      |  | 1873 | O2 | CS |
| 8 | BaZr <sub>0.8</sub> Er <sub>0.2</sub> O <sub>3</sub> | 517      | 0.023 |      |  | 1873 | O2 | CS |
| 8 | BaZr <sub>0.8</sub> Er <sub>0.2</sub> O <sub>3</sub> | 504      | 0.023 |      |  | 1873 | O2 | CS |
| 8 | BaZr <sub>0.8</sub> Er <sub>0.2</sub> O <sub>3</sub> | 493      | 0.023 |      |  | 1873 | O2 | CS |
| 8 | BaZr <sub>0.8</sub> Er <sub>0.2</sub> O <sub>3</sub> | 481      | 0.023 |      |  | 1873 | O2 | CS |
| 8 | BaZr <sub>0.8</sub> Er <sub>0.2</sub> O <sub>3</sub> | 471      | 0.023 |      |  | 1873 | O2 | CS |
| 8 | BaZr <sub>0.8</sub> Er <sub>0.2</sub> O <sub>3</sub> | 458      | 0.023 |      |  | 1873 | O2 | CS |
| 8 | BaZr <sub>0.8</sub> Er <sub>0.2</sub> O <sub>3</sub> | 446      | 0.023 |      |  | 1873 | O2 | CS |
| 8 | BaZr <sub>0.8</sub> Er <sub>0.2</sub> O <sub>3</sub> | 437      | 0.023 |      |  | 1873 | O2 | CS |
| 8 | BaZr <sub>0.8</sub> Er <sub>0.2</sub> O <sub>3</sub> | 426      | 0.023 |      |  | 1873 | O2 | CS |
| 8 | BaZr <sub>0.8</sub> Er <sub>0.2</sub> O <sub>3</sub> | 415      | 0.023 |      |  | 1873 | O2 | CS |
| 8 | BaZr <sub>0.8</sub> Er <sub>0.2</sub> O <sub>3</sub> | 404      | 0.023 |      |  | 1873 | O2 | CS |
| 8 | BaZr <sub>0.8</sub> Er <sub>0.2</sub> O <sub>3</sub> | 394      | 0.023 |      |  | 1873 | O2 | CS |
| 8 | BaZr <sub>0.8</sub> Er <sub>0.2</sub> O <sub>3</sub> | 383      | 0.023 |      |  | 1873 | O2 | CS |
| 8 | BaZr <sub>0.8</sub> Er <sub>0.2</sub> O <sub>3</sub> | 373      | 0.023 |      |  | 1873 | O2 | CS |
| 8 | BaZr <sub>0.8</sub> Er <sub>0.2</sub> O <sub>3</sub> | 361      | 0.023 |      |  | 1873 | O2 | CS |
| 8 | BaZr <sub>0.8</sub> Er <sub>0.2</sub> O <sub>3</sub> | 351      | 0.023 |      |  | 1873 | O2 | CS |
| 8 | BaZr <sub>0.8</sub> Er <sub>0.2</sub> O <sub>3</sub> | 341      | 0.023 |      |  | 1873 | O2 | CS |
| 8 | BaZr <sub>0.8</sub> Er <sub>0.2</sub> O <sub>3</sub> | 331      | 0.023 |      |  | 1873 | O2 | CS |
| 8 | BaZr <sub>0.8</sub> Er <sub>0.2</sub> O <sub>3</sub> | 321      | 0.023 |      |  | 1873 | O2 | CS |
| 8 | BaZr <sub>0.8</sub> Er <sub>0.2</sub> O <sub>3</sub> | 311      | 0.023 |      |  | 1873 | O2 | CS |
| 8 | BaZr <sub>0.8</sub> Er <sub>0.2</sub> O <sub>3</sub> | 301      | 0.023 |      |  | 1873 | O2 | CS |
| 9 | BaZr <sub>0.8</sub> Y <sub>0.2</sub> O <sub>3</sub>  | 573      | 0.019 | 0.01 |  | 1873 | O2 | CS |
| 9 | BaZr <sub>0.8</sub> Y <sub>0.2</sub> O <sub>3</sub>  | 673      | 0.019 | 0.01 |  | 1873 | O2 | CS |
| 9 | BaZr <sub>0.8</sub> Y <sub>0.2</sub> O <sub>3</sub>  | 873      | 0.019 | 0.01 |  | 1873 | O2 | CS |
| 9 | BaZr <sub>0.8</sub> Y <sub>0.2</sub> O <sub>3</sub>  | 973      | 0.019 | 0.01 |  | 1873 | O2 | CS |
| 9 | BaZr <sub>0.8</sub> Y <sub>0.2</sub> O <sub>3</sub>  | 1073     | 0.019 | 0.01 |  | 1873 | O2 | CS |
| 9 | BaZr <sub>0.8</sub> Y <sub>0.2</sub> O <sub>3</sub>  | 651.1985 | 0.023 |      |  | 1873 | O2 | CS |
| 9 | BaZr <sub>0.8</sub> Y <sub>0.2</sub> O <sub>3</sub>  | 636.3995 | 0.023 |      |  | 1873 | O2 | CS |
| 9 | BaZr <sub>0.8</sub> Y <sub>0.2</sub> O <sub>3</sub>  | 620.5014 | 0.023 |      |  | 1873 | O2 | CS |
| 9 | BaZr <sub>0.8</sub> Y <sub>0.2</sub> O <sub>3</sub>  | 605.4991 | 0.023 |      |  | 1873 | O2 | CS |
| 9 | BaZr <sub>0.8</sub> Y <sub>0.2</sub> O <sub>3</sub>  | 589.5983 | 0.023 |      |  | 1873 | O2 | CS |
| 9 | BaZr <sub>0.8</sub> Y <sub>0.2</sub> O <sub>3</sub>  | 579.9993 | 0.023 |      |  | 1873 | O2 | CS |
| 9 | BaZr <sub>0.8</sub> Y <sub>0.2</sub> O <sub>3</sub>  | 569.1001 | 0.023 |      |  | 1873 | O2 | CS |
| 9 | BaZr <sub>0.8</sub> Y <sub>0.2</sub> O <sub>3</sub>  | 559.1997 | 0.023 |      |  | 1873 | O2 | CS |
| 9 | BaZr <sub>0.8</sub> Y <sub>0.2</sub> O <sub>3</sub>  | 549.3992 | 0.023 |      |  | 1873 | O2 | CS |
| 9 | BaZr <sub>0.8</sub> Y <sub>0.2</sub> O <sub>3</sub>  | 538.4015 | 0.023 |      |  | 1873 | O2 | CS |
| 9 | BaZr <sub>0.8</sub> Y <sub>0.2</sub> O <sub>3</sub>  | 528.3988 | 0.023 |      |  | 1873 | O2 | CS |
| 9 | BaZr <sub>0.8</sub> Y <sub>0.2</sub> O <sub>3</sub>  | 518.2985 | 0.023 |      |  | 1873 | O2 | CS |
| 9 | BaZr <sub>0.8</sub> Y <sub>0.2</sub> O <sub>3</sub>  | 507.1997 | 0.023 |      |  | 1873 | O2 | CS |
| 9 | BaZr <sub>0.8</sub> Y <sub>0.2</sub> O <sub>3</sub>  | 497.5991 | 0.023 |      |  | 1873 | O2 | CS |
| 9 | BaZr <sub>0.8</sub> Y <sub>0.2</sub> O <sub>3</sub>  | 487.4007 | 0.023 |      |  | 1873 | O2 | CS |
| 9 | BaZr <sub>0.8</sub> Y <sub>0.2</sub> O <sub>3</sub>  | 477.3999 | 0.023 |      |  | 1873 | O2 | CS |
| 9 | BaZr <sub>0.8</sub> Y <sub>0.2</sub> O <sub>3</sub>  | 466.2005 | 0.023 |      |  | 1873 | O2 | CS |
| 9 | BaZr <sub>0.8</sub> Y <sub>0.2</sub> O <sub>3</sub>  | 456.5001 | 0.023 |      |  | 1873 | O2 | CS |
| 9 | BaZr <sub>0.8</sub> Y <sub>0.2</sub> O <sub>3</sub>  | 446.6    | 0.023 |      |  | 1873 | O2 | CS |
| 9 | BaZr <sub>0.8</sub> Y <sub>0.2</sub> O <sub>3</sub>  | 435.8001 | 0.023 |      |  | 1873 | O2 | CS |
| 9 | BaZr <sub>0.8</sub> Y <sub>0.2</sub> O <sub>3</sub>  | 425.9996 | 0.023 |      |  | 1873 | O2 | CS |
| 9 | BaZr <sub>0.8</sub> Y <sub>0.2</sub> O <sub>3</sub>  | 416.5001 | 0.023 |      |  | 1873 | O2 | CS |
| 9 | BaZr <sub>0.8</sub> Y <sub>0.2</sub> O <sub>3</sub>  | 405.9002 | 0.023 |      |  | 1873 | O2 | CS |
| 9 | BaZr <sub>0.8</sub> Y <sub>0.2</sub> O <sub>3</sub>  | 395.7998 | 0.023 |      |  | 1873 | O2 | CS |
| 9 | BaZr <sub>0.8</sub> Y <sub>0.2</sub> O <sub>3</sub>  | 386.1004 | 0.023 |      |  | 1873 | O2 | CS |
| 9 | BaZr <sub>0.8</sub> Y <sub>0.2</sub> O <sub>3</sub>  | 376.3006 | 0.023 |      |  | 1873 | O2 | CS |
| 9 | BaZr <sub>0.8</sub> Y <sub>0.2</sub> O <sub>3</sub>  | 365.6    | 0.023 |      |  | 1873 | O2 | CS |
| 9 | BaZr <sub>0.8</sub> Y <sub>0.2</sub> O <sub>3</sub>  | 355.9998 | 0.023 |      |  | 1873 | O2 | CS |

|    |                                                        |          |       |      |  |      |     |     |
|----|--------------------------------------------------------|----------|-------|------|--|------|-----|-----|
| 9  | BaZr <sub>0.8</sub> Y <sub>0.2</sub> O <sub>3</sub>    | 346.6    | 0.023 |      |  | 1873 | O2  | CS  |
| 9  | BaZr <sub>0.8</sub> Y <sub>0.2</sub> O <sub>3</sub>    | 336.0994 | 0.023 |      |  | 1873 | O2  | CS  |
| 9  | BaZr <sub>0.8</sub> Y <sub>0.2</sub> O <sub>3</sub>    | 325.7    | 0.023 |      |  | 1873 | O2  | CS  |
| 9  | BaZr <sub>0.8</sub> Y <sub>0.2</sub> O <sub>3</sub>    | 317.3999 | 0.023 |      |  | 1873 | O2  | CS  |
| 9  | BaZr <sub>0.8</sub> Y <sub>0.2</sub> O <sub>3</sub>    | 307.4    | 0.023 |      |  | 1873 | O2  | CS  |
| 10 | BaZr <sub>0.8</sub> Gd <sub>0.2</sub> O <sub>3</sub>   | 626      | 0.023 |      |  | 1873 | O2  | CS  |
| 10 | BaZr <sub>0.8</sub> Gd <sub>0.2</sub> O <sub>3</sub>   | 609      | 0.023 |      |  | 1873 | O2  | CS  |
| 10 | BaZr <sub>0.8</sub> Gd <sub>0.2</sub> O <sub>3</sub>   | 591      | 0.023 |      |  | 1873 | O2  | CS  |
| 10 | BaZr <sub>0.8</sub> Gd <sub>0.2</sub> O <sub>3</sub>   | 574      | 0.023 |      |  | 1873 | O2  | CS  |
| 10 | BaZr <sub>0.8</sub> Gd <sub>0.2</sub> O <sub>3</sub>   | 564      | 0.023 |      |  | 1873 | O2  | CS  |
| 10 | BaZr <sub>0.8</sub> Gd <sub>0.2</sub> O <sub>3</sub>   | 550      | 0.023 |      |  | 1873 | O2  | CS  |
| 10 | BaZr <sub>0.8</sub> Gd <sub>0.2</sub> O <sub>3</sub>   | 539      | 0.023 |      |  | 1873 | O2  | CS  |
| 10 | BaZr <sub>0.8</sub> Gd <sub>0.2</sub> O <sub>3</sub>   | 528      | 0.023 |      |  | 1873 | O2  | CS  |
| 10 | BaZr <sub>0.8</sub> Gd <sub>0.2</sub> O <sub>3</sub>   | 517      | 0.023 |      |  | 1873 | O2  | CS  |
| 10 | BaZr <sub>0.8</sub> Gd <sub>0.2</sub> O <sub>3</sub>   | 504      | 0.023 |      |  | 1873 | O2  | CS  |
| 10 | BaZr <sub>0.8</sub> Gd <sub>0.2</sub> O <sub>3</sub>   | 493      | 0.023 |      |  | 1873 | O2  | CS  |
| 10 | BaZr <sub>0.8</sub> Gd <sub>0.2</sub> O <sub>3</sub>   | 481      | 0.023 |      |  | 1873 | O2  | CS  |
| 10 | BaZr <sub>0.8</sub> Gd <sub>0.2</sub> O <sub>3</sub>   | 471      | 0.023 |      |  | 1873 | O2  | CS  |
| 10 | BaZr <sub>0.8</sub> Gd <sub>0.2</sub> O <sub>3</sub>   | 458      | 0.023 |      |  | 1873 | O2  | CS  |
| 10 | BaZr <sub>0.8</sub> Gd <sub>0.2</sub> O <sub>3</sub>   | 446      | 0.023 |      |  | 1873 | O2  | CS  |
| 10 | BaZr <sub>0.8</sub> Gd <sub>0.2</sub> O <sub>3</sub>   | 437      | 0.023 |      |  | 1873 | O2  | CS  |
| 10 | BaZr <sub>0.8</sub> Gd <sub>0.2</sub> O <sub>3</sub>   | 426      | 0.023 |      |  | 1873 | O2  | CS  |
| 10 | BaZr <sub>0.8</sub> Gd <sub>0.2</sub> O <sub>3</sub>   | 415      | 0.023 |      |  | 1873 | O2  | CS  |
| 10 | BaZr <sub>0.8</sub> Gd <sub>0.2</sub> O <sub>3</sub>   | 404      | 0.023 |      |  | 1873 | O2  | CS  |
| 10 | BaZr <sub>0.8</sub> Gd <sub>0.2</sub> O <sub>3</sub>   | 394      | 0.023 |      |  | 1873 | O2  | CS  |
| 10 | BaZr <sub>0.8</sub> Gd <sub>0.2</sub> O <sub>3</sub>   | 383      | 0.023 |      |  | 1873 | O2  | CS  |
| 10 | BaZr <sub>0.8</sub> Gd <sub>0.2</sub> O <sub>3</sub>   | 373      | 0.023 |      |  | 1873 | O2  | CS  |
| 10 | BaZr <sub>0.8</sub> Gd <sub>0.2</sub> O <sub>3</sub>   | 361      | 0.023 |      |  | 1873 | O2  | CS  |
| 10 | BaZr <sub>0.8</sub> Gd <sub>0.2</sub> O <sub>3</sub>   | 351      | 0.023 |      |  | 1873 | O2  | CS  |
| 10 | BaZr <sub>0.8</sub> Gd <sub>0.2</sub> O <sub>3</sub>   | 341      | 0.023 |      |  | 1873 | O2  | CS  |
| 10 | BaZr <sub>0.8</sub> Gd <sub>0.2</sub> O <sub>3</sub>   | 331      | 0.023 |      |  | 1873 | O2  | CS  |
| 11 | SrCe <sub>0.98</sub> Yb <sub>0.02</sub> O <sub>3</sub> | 673      | 0.019 | 0.01 |  | 1873 | air | SSR |
| 11 | SrCe <sub>0.98</sub> Yb <sub>0.02</sub> O <sub>3</sub> | 723      | 0.019 | 0.01 |  | 1873 | air | SSR |
| 11 | SrCe <sub>0.98</sub> Yb <sub>0.02</sub> O <sub>3</sub> | 773      | 0.019 | 0.01 |  | 1873 | air | SSR |
| 11 | SrCe <sub>0.98</sub> Yb <sub>0.02</sub> O <sub>3</sub> | 823      | 0.019 | 0.01 |  | 1873 | air | SSR |
| 11 | SrCe <sub>0.98</sub> Yb <sub>0.02</sub> O <sub>3</sub> | 873      | 0.019 | 0.01 |  | 1873 | air | SSR |
| 11 | SrCe <sub>0.98</sub> Yb <sub>0.02</sub> O <sub>3</sub> | 923      | 0.019 | 0.01 |  | 1873 | air | SSR |
| 11 | SrCe <sub>0.98</sub> Yb <sub>0.02</sub> O <sub>3</sub> | 973      | 0.019 | 0.01 |  | 1873 | air | SSR |
| 11 | SrCe <sub>0.98</sub> Yb <sub>0.02</sub> O <sub>3</sub> | 1023     | 0.019 | 0.01 |  | 1873 | air | SSR |
| 11 | SrCe <sub>0.98</sub> Yb <sub>0.02</sub> O <sub>3</sub> | 1073     | 0.019 | 0.01 |  | 1873 | air | SSR |
| 11 | SrCe <sub>0.98</sub> Yb <sub>0.02</sub> O <sub>3</sub> | 1123     | 0.019 | 0.01 |  | 1873 | air | SSR |
| 11 | SrCe <sub>0.98</sub> Yb <sub>0.02</sub> O <sub>3</sub> | 1173     | 0.019 | 0.01 |  | 1873 | air | SSR |
| 12 | SrCe <sub>0.95</sub> Yb <sub>0.05</sub> O <sub>3</sub> | 673      | 0.019 | 0.01 |  | 1873 | air | SSR |
| 12 | SrCe <sub>0.95</sub> Yb <sub>0.05</sub> O <sub>3</sub> | 723      | 0.019 | 0.01 |  | 1873 | air | SSR |
| 12 | SrCe <sub>0.95</sub> Yb <sub>0.05</sub> O <sub>3</sub> | 773      | 0.019 | 0.01 |  | 1873 | air | SSR |
| 12 | SrCe <sub>0.95</sub> Yb <sub>0.05</sub> O <sub>3</sub> | 823      | 0.019 | 0.01 |  | 1873 | air | SSR |
| 12 | SrCe <sub>0.95</sub> Yb <sub>0.05</sub> O <sub>3</sub> | 873      | 0.019 | 0.01 |  | 1873 | air | SSR |
| 12 | SrCe <sub>0.95</sub> Yb <sub>0.05</sub> O <sub>3</sub> | 923      | 0.019 | 0.01 |  | 1873 | air | SSR |
| 12 | SrCe <sub>0.95</sub> Yb <sub>0.05</sub> O <sub>3</sub> | 973      | 0.019 | 0.01 |  | 1873 | air | SSR |
| 12 | SrCe <sub>0.95</sub> Yb <sub>0.05</sub> O <sub>3</sub> | 1023     | 0.019 | 0.01 |  | 1873 | air | SSR |
| 12 | SrCe <sub>0.95</sub> Yb <sub>0.05</sub> O <sub>3</sub> | 1073     | 0.019 | 0.01 |  | 1873 | air | SSR |
| 12 | SrCe <sub>0.95</sub> Yb <sub>0.05</sub> O <sub>3</sub> | 1123     | 0.019 | 0.01 |  | 1873 | air | SSR |
| 12 | SrCe <sub>0.95</sub> Yb <sub>0.05</sub> O <sub>3</sub> | 1173     | 0.019 | 0.01 |  | 1873 | air | SSR |
| 13 | SrCe <sub>0.9</sub> Yb <sub>0.1</sub> O <sub>3</sub>   | 673      | 0.019 | 0.01 |  | 1873 | air | SSR |
| 13 | SrCe <sub>0.9</sub> Yb <sub>0.1</sub> O <sub>3</sub>   | 723      | 0.019 | 0.01 |  | 1873 | air | SSR |
| 13 | SrCe <sub>0.9</sub> Yb <sub>0.1</sub> O <sub>3</sub>   | 773      | 0.019 | 0.01 |  | 1873 | air | SSR |
| 13 | SrCe <sub>0.9</sub> Yb <sub>0.1</sub> O <sub>3</sub>   | 823      | 0.019 | 0.01 |  | 1873 | air | SSR |
| 13 | SrCe <sub>0.9</sub> Yb <sub>0.1</sub> O <sub>3</sub>   | 873      | 0.019 | 0.01 |  | 1873 | air | SSR |
| 13 | SrCe <sub>0.9</sub> Yb <sub>0.1</sub> O <sub>3</sub>   | 923      | 0.019 | 0.01 |  | 1873 | air | SSR |
| 13 | SrCe <sub>0.9</sub> Yb <sub>0.1</sub> O <sub>3</sub>   | 973      | 0.019 | 0.01 |  | 1873 | air | SSR |
| 13 | SrCe <sub>0.9</sub> Yb <sub>0.1</sub> O <sub>3</sub>   | 1023     | 0.019 | 0.01 |  | 1873 | air | SSR |
| 13 | SrCe <sub>0.9</sub> Yb <sub>0.1</sub> O <sub>3</sub>   | 1073     | 0.019 | 0.01 |  | 1873 | air | SSR |
| 13 | SrCe <sub>0.9</sub> Yb <sub>0.1</sub> O <sub>3</sub>   | 1123     | 0.019 | 0.01 |  | 1873 | air | SSR |
| 13 | SrCe <sub>0.9</sub> Yb <sub>0.1</sub> O <sub>3</sub>   | 1173     | 0.019 | 0.01 |  | 1873 | air | SSR |
| 14 | SrCe <sub>0.85</sub> Yb <sub>0.15</sub> O <sub>3</sub> | 673      | 0.019 | 0.01 |  | 1873 | air | SSR |













|    |                                                                                                            |      |       |      |  |      |    |    |
|----|------------------------------------------------------------------------------------------------------------|------|-------|------|--|------|----|----|
| 60 | BaZr <sub>0.6</sub> Yb <sub>0.2</sub> In <sub>0.2</sub> O <sub>3</sub>                                     | 673  | 0.019 | 0.01 |  | 1873 | O2 | CS |
| 60 | BaZr <sub>0.6</sub> Yb <sub>0.2</sub> In <sub>0.2</sub> O <sub>3</sub>                                     | 573  | 0.019 | 0.01 |  | 1873 | O2 | CS |
| 60 | BaZr <sub>0.6</sub> Yb <sub>0.2</sub> In <sub>0.2</sub> O <sub>3</sub>                                     | 473  | 0.019 | 0.01 |  | 1873 | O2 | CS |
| 61 | BaZr <sub>0.55</sub> Yb <sub>0.2</sub> In <sub>0.25</sub> O <sub>3</sub>                                   | 1173 | 0.019 | 0.01 |  | 1873 | O2 | CS |
| 61 | BaZr <sub>0.55</sub> Yb <sub>0.2</sub> In <sub>0.25</sub> O <sub>3</sub>                                   | 1073 | 0.019 | 0.01 |  | 1873 | O2 | CS |
| 61 | BaZr <sub>0.55</sub> Yb <sub>0.2</sub> In <sub>0.25</sub> O <sub>3</sub>                                   | 973  | 0.019 | 0.01 |  | 1873 | O2 | CS |
| 61 | BaZr <sub>0.55</sub> Yb <sub>0.2</sub> In <sub>0.25</sub> O <sub>3</sub>                                   | 873  | 0.019 | 0.01 |  | 1873 | O2 | CS |
| 61 | BaZr <sub>0.55</sub> Yb <sub>0.2</sub> In <sub>0.25</sub> O <sub>3</sub>                                   | 773  | 0.019 | 0.01 |  | 1873 | O2 | CS |
| 61 | BaZr <sub>0.55</sub> Yb <sub>0.2</sub> In <sub>0.25</sub> O <sub>3</sub>                                   | 673  | 0.019 | 0.01 |  | 1873 | O2 | CS |
| 61 | BaZr <sub>0.55</sub> Yb <sub>0.2</sub> In <sub>0.25</sub> O <sub>3</sub>                                   | 573  | 0.019 | 0.01 |  | 1873 | O2 | CS |
| 61 | BaZr <sub>0.55</sub> Yb <sub>0.2</sub> In <sub>0.25</sub> O <sub>3</sub>                                   | 473  | 0.019 | 0.01 |  | 1873 | O2 | CS |
| 61 | BaZr <sub>0.55</sub> Yb <sub>0.2</sub> In <sub>0.25</sub> O <sub>3</sub>                                   | 373  | 0.019 | 0.01 |  | 1873 | O2 | CS |
| 62 | BaZr <sub>0.5</sub> Yb <sub>0.2</sub> In <sub>0.3</sub> O <sub>3</sub>                                     | 1173 | 0.019 | 0.01 |  | 1873 | O2 | CS |
| 62 | BaZr <sub>0.5</sub> Yb <sub>0.2</sub> In <sub>0.3</sub> O <sub>3</sub>                                     | 1073 | 0.019 | 0.01 |  | 1873 | O2 | CS |
| 62 | BaZr <sub>0.5</sub> Yb <sub>0.2</sub> In <sub>0.3</sub> O <sub>3</sub>                                     | 973  | 0.019 | 0.01 |  | 1873 | O2 | CS |
| 62 | BaZr <sub>0.5</sub> Yb <sub>0.2</sub> In <sub>0.3</sub> O <sub>3</sub>                                     | 873  | 0.019 | 0.01 |  | 1873 | O2 | CS |
| 62 | BaZr <sub>0.5</sub> Yb <sub>0.2</sub> In <sub>0.3</sub> O <sub>3</sub>                                     | 773  | 0.019 | 0.01 |  | 1873 | O2 | CS |
| 62 | BaZr <sub>0.5</sub> Yb <sub>0.2</sub> In <sub>0.3</sub> O <sub>3</sub>                                     | 673  | 0.019 | 0.01 |  | 1873 | O2 | CS |
| 62 | BaZr <sub>0.5</sub> Yb <sub>0.2</sub> In <sub>0.3</sub> O <sub>3</sub>                                     | 573  | 0.019 | 0.01 |  | 1873 | O2 | CS |
| 62 | BaZr <sub>0.5</sub> Yb <sub>0.2</sub> In <sub>0.3</sub> O <sub>3</sub>                                     | 473  | 0.019 | 0.01 |  | 1873 | O2 | CS |
| 63 | Ba <sub>0.3</sub> Sr <sub>0.7</sub> Zr <sub>0.44</sub> Ce <sub>0.36</sub> Y <sub>0.22</sub> O <sub>3</sub> | 673  | 0.019 | 0.01 |  | 1873 | O2 | CS |
| 63 | Ba <sub>0.3</sub> Sr <sub>0.7</sub> Zr <sub>0.44</sub> Ce <sub>0.36</sub> Y <sub>0.22</sub> O <sub>3</sub> | 773  | 0.019 | 0.01 |  | 1873 | O2 | CS |
| 63 | Ba <sub>0.3</sub> Sr <sub>0.7</sub> Zr <sub>0.44</sub> Ce <sub>0.36</sub> Y <sub>0.22</sub> O <sub>3</sub> | 873  | 0.019 | 0.01 |  | 1873 | O2 | CS |
| 63 | Ba <sub>0.3</sub> Sr <sub>0.7</sub> Zr <sub>0.44</sub> Ce <sub>0.36</sub> Y <sub>0.22</sub> O <sub>3</sub> | 973  | 0.019 | 0.01 |  | 1873 | O2 | CS |
| 63 | Ba <sub>0.3</sub> Sr <sub>0.7</sub> Zr <sub>0.44</sub> Ce <sub>0.36</sub> Y <sub>0.22</sub> O <sub>3</sub> | 1073 | 0.019 | 0.01 |  | 1873 | O2 | CS |
| 64 | Ba <sub>0.9</sub> Sr <sub>0.1</sub> Zr <sub>0.8</sub> Yb <sub>0.2</sub> O <sub>3</sub>                     | 573  | 0.019 | 0.01 |  | 1873 | O2 | CS |
| 64 | Ba <sub>0.9</sub> Sr <sub>0.1</sub> Zr <sub>0.8</sub> Yb <sub>0.2</sub> O <sub>3</sub>                     | 673  | 0.019 | 0.01 |  | 1873 | O2 | CS |
| 64 | Ba <sub>0.9</sub> Sr <sub>0.1</sub> Zr <sub>0.8</sub> Yb <sub>0.2</sub> O <sub>3</sub>                     | 873  | 0.019 | 0.01 |  | 1873 | O2 | CS |
| 64 | Ba <sub>0.9</sub> Sr <sub>0.1</sub> Zr <sub>0.8</sub> Yb <sub>0.2</sub> O <sub>3</sub>                     | 1073 | 0.019 | 0.01 |  | 1873 | O2 | CS |
| 65 | BaCe <sub>0.6</sub> Zr <sub>0.2</sub> Y <sub>0.2</sub> O <sub>3</sub>                                      | 673  | 0.019 | 0.01 |  | 1873 | O2 | CS |
| 65 | BaCe <sub>0.6</sub> Zr <sub>0.2</sub> Y <sub>0.2</sub> O <sub>3</sub>                                      | 873  | 0.019 | 0.01 |  | 1873 | O2 | CS |
| 65 | BaCe <sub>0.6</sub> Zr <sub>0.2</sub> Y <sub>0.2</sub> O <sub>3</sub>                                      | 973  | 0.019 | 0.01 |  | 1873 | O2 | CS |
| 65 | BaCe <sub>0.6</sub> Zr <sub>0.2</sub> Y <sub>0.2</sub> O <sub>3</sub>                                      | 1073 | 0.019 | 0.01 |  | 1873 | O2 | CS |
| 66 | BaCe <sub>0.8</sub> Y <sub>0.2</sub> O <sub>3</sub>                                                        | 673  | 0.019 | 0.01 |  | 1873 | O2 | CS |
| 66 | BaCe <sub>0.8</sub> Y <sub>0.2</sub> O <sub>3</sub>                                                        | 773  | 0.019 | 0.01 |  | 1873 | O2 | CS |
| 66 | BaCe <sub>0.8</sub> Y <sub>0.2</sub> O <sub>3</sub>                                                        | 873  | 0.019 | 0.01 |  | 1873 | O2 | CS |
| 66 | BaCe <sub>0.8</sub> Y <sub>0.2</sub> O <sub>3</sub>                                                        | 973  | 0.019 | 0.01 |  | 1873 | O2 | CS |
| 66 | BaCe <sub>0.8</sub> Y <sub>0.2</sub> O <sub>3</sub>                                                        | 1073 | 0.019 | 0.01 |  | 1873 | O2 | CS |
| 67 | BaZr <sub>0.44</sub> Ce <sub>0.36</sub> Y <sub>0.2</sub> O <sub>3</sub>                                    | 673  | 0.019 | 0.01 |  | 1873 | O2 | CS |
| 67 | BaZr <sub>0.44</sub> Ce <sub>0.36</sub> Y <sub>0.2</sub> O <sub>3</sub>                                    | 873  | 0.019 | 0.01 |  | 1873 | O2 | CS |
| 67 | BaZr <sub>0.44</sub> Ce <sub>0.36</sub> Y <sub>0.2</sub> O <sub>3</sub>                                    | 1073 | 0.019 | 0.01 |  | 1873 | O2 | CS |
| 68 | BaZr <sub>0.8</sub> Tm <sub>0.2</sub> O <sub>3</sub>                                                       | 573  | 0.019 | 0.01 |  | 1873 | O2 | CS |
| 68 | BaZr <sub>0.8</sub> Tm <sub>0.2</sub> O <sub>3</sub>                                                       | 673  | 0.019 | 0.01 |  | 1873 | O2 | CS |
| 68 | BaZr <sub>0.8</sub> Tm <sub>0.2</sub> O <sub>3</sub>                                                       | 873  | 0.019 | 0.01 |  | 1873 | O2 | CS |
| 68 | BaZr <sub>0.8</sub> Tm <sub>0.2</sub> O <sub>3</sub>                                                       | 973  | 0.019 | 0.01 |  | 1873 | O2 | CS |
| 68 | BaZr <sub>0.8</sub> Tm <sub>0.2</sub> O <sub>3</sub>                                                       | 1073 | 0.019 | 0.01 |  | 1873 | O2 | CS |
| 69 | BaZr <sub>0.8</sub> Yb <sub>0.2</sub> O <sub>3</sub>                                                       | 573  | 0.019 | 0.01 |  | 1873 | O2 | CS |
| 69 | BaZr <sub>0.8</sub> Yb <sub>0.2</sub> O <sub>3</sub>                                                       | 673  | 0.019 | 0.01 |  | 1873 | O2 | CS |
| 69 | BaZr <sub>0.8</sub> Yb <sub>0.2</sub> O <sub>3</sub>                                                       | 873  | 0.019 | 0.01 |  | 1873 | O2 | CS |
| 69 | BaZr <sub>0.8</sub> Yb <sub>0.2</sub> O <sub>3</sub>                                                       | 973  | 0.019 | 0.01 |  | 1873 | O2 | CS |
| 69 | BaZr <sub>0.8</sub> Yb <sub>0.2</sub> O <sub>3</sub>                                                       | 1073 | 0.019 | 0.01 |  | 1873 | O2 | CS |
| 70 | La <sub>0.9</sub> Ba <sub>0.1</sub> In <sub>0.9</sub> Sc <sub>0.1</sub> O <sub>3</sub>                     | 873  | 0.019 | 0.01 |  | 1873 | O2 | CS |
| 70 | La <sub>0.9</sub> Ba <sub>0.1</sub> In <sub>0.9</sub> Sc <sub>0.1</sub> O <sub>3</sub>                     | 973  | 0.019 | 0.01 |  | 1873 | O2 | CS |
| 70 | La <sub>0.9</sub> Ba <sub>0.1</sub> In <sub>0.9</sub> Sc <sub>0.1</sub> O <sub>3</sub>                     | 1073 | 0.019 | 0.01 |  | 1873 | O2 | CS |
| 71 | SrCe <sub>0.97</sub> Yb <sub>0.03</sub> O <sub>3</sub>                                                     | 573  | 0.019 | 0.01 |  | 1873 | O2 | CS |
| 71 | SrCe <sub>0.97</sub> Yb <sub>0.03</sub> O <sub>3</sub>                                                     | 623  | 0.019 | 0.01 |  | 1873 | O2 | CS |
| 71 | SrCe <sub>0.97</sub> Yb <sub>0.03</sub> O <sub>3</sub>                                                     | 673  | 0.019 | 0.01 |  | 1873 | O2 | CS |
| 71 | SrCe <sub>0.97</sub> Yb <sub>0.03</sub> O <sub>3</sub>                                                     | 723  | 0.019 | 0.01 |  | 1873 | O2 | CS |
| 71 | SrCe <sub>0.97</sub> Yb <sub>0.03</sub> O <sub>3</sub>                                                     | 773  | 0.019 | 0.01 |  | 1873 | O2 | CS |
| 71 | SrCe <sub>0.97</sub> Yb <sub>0.03</sub> O <sub>3</sub>                                                     | 823  | 0.019 | 0.01 |  | 1873 | O2 | CS |
| 71 | SrCe <sub>0.97</sub> Yb <sub>0.03</sub> O <sub>3</sub>                                                     | 873  | 0.019 | 0.01 |  | 1873 | O2 | CS |
| 71 | SrCe <sub>0.97</sub> Yb <sub>0.03</sub> O <sub>3</sub>                                                     | 923  | 0.019 | 0.01 |  | 1873 | O2 | CS |
| 71 | SrCe <sub>0.97</sub> Yb <sub>0.03</sub> O <sub>3</sub>                                                     | 973  | 0.019 | 0.01 |  | 1873 | O2 | CS |
| 71 | SrCe <sub>0.97</sub> Yb <sub>0.03</sub> O <sub>3</sub>                                                     | 1023 | 0.019 | 0.01 |  | 1873 | O2 | CS |
| 71 | SrCe <sub>0.97</sub> Yb <sub>0.03</sub> O <sub>3</sub>                                                     | 1073 | 0.019 | 0.01 |  | 1873 | O2 | CS |

|    |                                                                             |      |       |      |  |      |    |    |
|----|-----------------------------------------------------------------------------|------|-------|------|--|------|----|----|
| 72 | $\text{SrCe}_{0.9}\text{Sc}_{0.05}\text{Gd}_{0.05}\text{O}_3$               | 873  | 0.019 | 0.01 |  | 1873 | O2 | CS |
| 72 | $\text{SrCe}_{0.9}\text{Sc}_{0.05}\text{Gd}_{0.05}\text{O}_3$               | 973  | 0.019 | 0.01 |  | 1873 | O2 | CS |
| 72 | $\text{SrCe}_{0.9}\text{Sc}_{0.05}\text{Gd}_{0.05}\text{O}_3$               | 1073 | 0.019 | 0.01 |  | 1873 | O2 | CS |
| 73 | $\text{BaCe}_{0.7}\text{Zr}_{0.1}\text{Y}_{0.1}\text{Yb}_{0.1}\text{O}_3$   | 873  | 0.019 | 0.01 |  | 1873 | O2 | CS |
| 73 | $\text{BaCe}_{0.7}\text{Zr}_{0.1}\text{Y}_{0.1}\text{Yb}_{0.1}\text{O}_3$   | 973  | 0.019 | 0.01 |  | 1873 | O2 | CS |
| 73 | $\text{BaCe}_{0.7}\text{Zr}_{0.1}\text{Y}_{0.1}\text{Yb}_{0.1}\text{O}_3$   | 1073 | 0.019 | 0.01 |  | 1873 | O2 | CS |
| 74 | $\text{BaCe}_{0.45}\text{Zr}_{0.35}\text{Y}_{0.1}\text{Yb}_{0.1}\text{O}_3$ | 873  | 0.019 | 0.01 |  | 1873 | O2 | CS |
| 74 | $\text{BaCe}_{0.45}\text{Zr}_{0.35}\text{Y}_{0.1}\text{Yb}_{0.1}\text{O}_3$ | 973  | 0.019 | 0.01 |  | 1873 | O2 | CS |
| 74 | $\text{BaCe}_{0.45}\text{Zr}_{0.35}\text{Y}_{0.1}\text{Yb}_{0.1}\text{O}_3$ | 1073 | 0.019 | 0.01 |  | 1873 | O2 | CS |
| 75 | $\text{BaCe}_{0.16}\text{Zr}_{0.64}\text{Y}_{0.1}\text{Yb}_{0.1}\text{O}_3$ | 873  | 0.019 | 0.01 |  | 1873 | O2 | CS |
| 75 | $\text{BaCe}_{0.16}\text{Zr}_{0.64}\text{Y}_{0.1}\text{Yb}_{0.1}\text{O}_3$ | 973  | 0.019 | 0.01 |  | 1873 | O2 | CS |
| 75 | $\text{BaCe}_{0.16}\text{Zr}_{0.64}\text{Y}_{0.1}\text{Yb}_{0.1}\text{O}_3$ | 1073 | 0.019 | 0.01 |  | 1873 | O2 | CS |
| 76 | $\text{SrZr}_{0.8}\text{Sc}_{0.2}\text{O}_3$                                | 873  | 0.019 | 0.01 |  | 1873 | O2 | CS |
| 76 | $\text{SrZr}_{0.8}\text{Sc}_{0.2}\text{O}_3$                                | 973  | 0.019 | 0.01 |  | 1873 | O2 | CS |
| 76 | $\text{SrZr}_{0.8}\text{Sc}_{0.2}\text{O}_3$                                | 1073 | 0.019 | 0.01 |  | 1873 | O2 | CS |

## hole conductivity

|   | composition                                    | impedance measurement condition |            |           | sintersing condition |                     |                      |        |
|---|------------------------------------------------|---------------------------------|------------|-----------|----------------------|---------------------|----------------------|--------|
|   |                                                | T/K                             | $p_{H_2O}$ | $p_{H_2}$ | $p_{O_2}$            | sintering temp. / K | sintering atmosphere | method |
| 1 | $SrZr_{0.5}Ce_{0.4}Y_{0.1}O_3$                 | 873                             | 0.019      |           | 0.21                 | 1873                | air                  | SSR    |
| 1 | $SrZr_{0.5}Ce_{0.4}Y_{0.1}O_3$                 | 1073                            | 0.019      |           | 0.21                 | 1873                | air                  | SSR    |
| 2 | $SrZr_{0.3}Ce_{0.6}Y_{0.1}O_3$                 | 873                             | 0.019      |           | 0.21                 | 1873                | air                  | SSR    |
| 3 | $BaZr_{0.44}Ce_{0.36}Y_{0.2}O_3$               | 873                             | 0.019      |           | 0.21                 | 1873                | O <sub>2</sub>       | CS     |
| 3 | $BaZr_{0.44}Ce_{0.36}Y_{0.2}O_3$               | 1073                            | 0.019      |           | 0.21                 | 1873                | O <sub>2</sub>       | CS     |
| 4 | $Ba_{0.3}Sr_{0.7}Zr_{0.44}Ce_{0.36}Y_{0.2}O_3$ | 773                             | 0.019      |           | 0.21                 | 1873                | O <sub>2</sub>       | CS     |
| 4 | $Ba_{0.3}Sr_{0.7}Zr_{0.44}Ce_{0.36}Y_{0.2}O_3$ | 873                             | 0.019      |           | 0.21                 | 1873                | O <sub>2</sub>       | CS     |
| 4 | $Ba_{0.3}Sr_{0.7}Zr_{0.44}Ce_{0.36}Y_{0.2}O_3$ | 973                             | 0.019      |           | 0.21                 | 1873                | O <sub>2</sub>       | CS     |
| 4 | $Ba_{0.3}Sr_{0.7}Zr_{0.44}Ce_{0.36}Y_{0.2}O_3$ | 1073                            | 0.019      |           | 0.21                 | 1873                | O <sub>2</sub>       | CS     |
| 5 | $BaCe_{0.16}Zr_{0.64}Y_{0.1}Yb_{0.1}O_3$       | 873                             | 0.019      |           | 0.21                 | 1873                | O <sub>2</sub>       | CS     |
| 5 | $BaCe_{0.16}Zr_{0.64}Y_{0.1}Yb_{0.1}O_3$       | 973                             | 0.019      |           | 0.21                 | 1873                | O <sub>2</sub>       | CS     |
| 5 | $BaCe_{0.16}Zr_{0.64}Y_{0.1}Yb_{0.1}O_3$       | 1073                            | 0.019      |           | 0.21                 | 1873                | O <sub>2</sub>       | CS     |
| 6 | $SrTi_{0.95}Fe_{0.05}O_3$                      | 575                             |            |           | 0.21                 | 1573                | air                  | SSR    |
| 6 | $SrTi_{0.95}Fe_{0.05}O_3$                      | 597                             |            |           | 0.21                 | 1573                | air                  | SSR    |
| 6 | $SrTi_{0.95}Fe_{0.05}O_3$                      | 623                             |            |           | 0.21                 | 1573                | air                  | SSR    |
| 6 | $SrTi_{0.95}Fe_{0.05}O_3$                      | 647                             |            |           | 0.21                 | 1573                | air                  | SSR    |
| 6 | $SrTi_{0.95}Fe_{0.05}O_3$                      | 676                             |            |           | 0.21                 | 1573                | air                  | SSR    |
| 6 | $SrTi_{0.95}Fe_{0.05}O_3$                      | 699                             |            |           | 0.21                 | 1573                | air                  | SSR    |
| 6 | $SrTi_{0.95}Fe_{0.05}O_3$                      | 725                             |            |           | 0.21                 | 1573                | air                  | SSR    |
| 6 | $SrTi_{0.95}Fe_{0.05}O_3$                      | 746                             |            |           | 0.21                 | 1573                | air                  | SSR    |
| 6 | $SrTi_{0.95}Fe_{0.05}O_3$                      | 775                             |            |           | 0.21                 | 1573                | air                  | SSR    |
| 6 | $SrTi_{0.95}Fe_{0.05}O_3$                      | 800                             |            |           | 0.21                 | 1573                | air                  | SSR    |
| 6 | $SrTi_{0.95}Fe_{0.05}O_3$                      | 820                             |            |           | 0.21                 | 1573                | air                  | SSR    |
| 6 | $SrTi_{0.95}Fe_{0.05}O_3$                      | 847                             |            |           | 0.21                 | 1573                | air                  | SSR    |
| 6 | $SrTi_{0.95}Fe_{0.05}O_3$                      | 870                             |            |           | 0.21                 | 1573                | air                  | SSR    |
| 6 | $SrTi_{0.95}Fe_{0.05}O_3$                      | 901                             |            |           | 0.21                 | 1573                | air                  | SSR    |
| 6 | $SrTi_{0.95}Fe_{0.05}O_3$                      | 917                             |            |           | 0.21                 | 1573                | air                  | SSR    |
| 6 | $SrTi_{0.95}Fe_{0.05}O_3$                      | 943                             |            |           | 0.21                 | 1573                | air                  | SSR    |
| 6 | $SrTi_{0.95}Fe_{0.05}O_3$                      | 976                             |            |           | 0.21                 | 1573                | air                  | SSR    |
| 6 | $SrTi_{0.95}Fe_{0.05}O_3$                      | 995                             |            |           | 0.21                 | 1573                | air                  | SSR    |
| 6 | $SrTi_{0.95}Fe_{0.05}O_3$                      | 1010                            |            |           | 0.21                 | 1573                | air                  | SSR    |
| 6 | $SrTi_{0.95}Fe_{0.05}O_3$                      | 1047                            |            |           | 0.21                 | 1573                | air                  | SSR    |
| 6 | $SrTi_{0.95}Fe_{0.05}O_3$                      | 1081                            |            |           | 0.21                 | 1573                | air                  | SSR    |
| 7 | $SrTi_{0.9}Fe_{0.1}O_3$                        | 575                             |            |           | 0.21                 | 1573                | air                  | SSR    |
| 7 | $SrTi_{0.9}Fe_{0.1}O_3$                        | 597                             |            |           | 0.21                 | 1573                | air                  | SSR    |
| 7 | $SrTi_{0.9}Fe_{0.1}O_3$                        | 623                             |            |           | 0.21                 | 1573                | air                  | SSR    |
| 7 | $SrTi_{0.9}Fe_{0.1}O_3$                        | 647                             |            |           | 0.21                 | 1573                | air                  | SSR    |
| 7 | $SrTi_{0.9}Fe_{0.1}O_3$                        | 676                             |            |           | 0.21                 | 1573                | air                  | SSR    |
| 7 | $SrTi_{0.9}Fe_{0.1}O_3$                        | 699                             |            |           | 0.21                 | 1573                | air                  | SSR    |
| 7 | $SrTi_{0.9}Fe_{0.1}O_3$                        | 725                             |            |           | 0.21                 | 1573                | air                  | SSR    |
| 7 | $SrTi_{0.9}Fe_{0.1}O_3$                        | 746                             |            |           | 0.21                 | 1573                | air                  | SSR    |
| 7 | $SrTi_{0.9}Fe_{0.1}O_3$                        | 775                             |            |           | 0.21                 | 1573                | air                  | SSR    |
| 7 | $SrTi_{0.9}Fe_{0.1}O_3$                        | 800                             |            |           | 0.21                 | 1573                | air                  | SSR    |
| 7 | $SrTi_{0.9}Fe_{0.1}O_3$                        | 820                             |            |           | 0.21                 | 1573                | air                  | SSR    |
| 7 | $SrTi_{0.9}Fe_{0.1}O_3$                        | 847                             |            |           | 0.21                 | 1573                | air                  | SSR    |
| 7 | $SrTi_{0.9}Fe_{0.1}O_3$                        | 870                             |            |           | 0.21                 | 1573                | air                  | SSR    |
| 7 | $SrTi_{0.9}Fe_{0.1}O_3$                        | 901                             |            |           | 0.21                 | 1573                | air                  | SSR    |
| 7 | $SrTi_{0.9}Fe_{0.1}O_3$                        | 917                             |            |           | 0.21                 | 1573                | air                  | SSR    |
| 7 | $SrTi_{0.9}Fe_{0.1}O_3$                        | 943                             |            |           | 0.21                 | 1573                | air                  | SSR    |
| 7 | $SrTi_{0.9}Fe_{0.1}O_3$                        | 976                             |            |           | 0.21                 | 1573                | air                  | SSR    |
| 7 | $SrTi_{0.9}Fe_{0.1}O_3$                        | 995                             |            |           | 0.21                 | 1573                | air                  | SSR    |
| 7 | $SrTi_{0.9}Fe_{0.1}O_3$                        | 1010                            |            |           | 0.21                 | 1573                | air                  | SSR    |
| 7 | $SrTi_{0.9}Fe_{0.1}O_3$                        | 1047                            |            |           | 0.21                 | 1573                | air                  | SSR    |
| 7 | $SrTi_{0.9}Fe_{0.1}O_3$                        | 1081                            |            |           | 0.21                 | 1573                | air                  | SSR    |
| 8 | $SrTi_{0.85}Fe_{0.15}O_3$                      | 575                             |            |           | 0.21                 | 1573                | air                  | SSR    |
| 8 | $SrTi_{0.85}Fe_{0.15}O_3$                      | 597                             |            |           | 0.21                 | 1573                | air                  | SSR    |
| 8 | $SrTi_{0.85}Fe_{0.15}O_3$                      | 623                             |            |           | 0.21                 | 1573                | air                  | SSR    |
| 8 | $SrTi_{0.85}Fe_{0.15}O_3$                      | 647                             |            |           | 0.21                 | 1573                | air                  | SSR    |
| 8 | $SrTi_{0.85}Fe_{0.15}O_3$                      | 676                             |            |           | 0.21                 | 1573                | air                  | SSR    |
| 8 | $SrTi_{0.85}Fe_{0.15}O_3$                      | 699                             |            |           | 0.21                 | 1573                | air                  | SSR    |
| 8 | $SrTi_{0.85}Fe_{0.15}O_3$                      | 725                             |            |           | 0.21                 | 1573                | air                  | SSR    |
| 8 | $SrTi_{0.85}Fe_{0.15}O_3$                      | 746                             |            |           | 0.21                 | 1573                | air                  | SSR    |
| 8 | $SrTi_{0.85}Fe_{0.15}O_3$                      | 775                             |            |           | 0.21                 | 1573                | air                  | SSR    |
| 8 | $SrTi_{0.85}Fe_{0.15}O_3$                      | 800                             |            |           | 0.21                 | 1573                | air                  | SSR    |
| 8 | $SrTi_{0.85}Fe_{0.15}O_3$                      | 820                             |            |           | 0.21                 | 1573                | air                  | SSR    |
| 8 | $SrTi_{0.85}Fe_{0.15}O_3$                      | 847                             |            |           | 0.21                 | 1573                | air                  | SSR    |
| 8 | $SrTi_{0.85}Fe_{0.15}O_3$                      | 870                             |            |           | 0.21                 | 1573                | air                  | SSR    |
| 8 | $SrTi_{0.85}Fe_{0.15}O_3$                      | 901                             |            |           | 0.21                 | 1573                | air                  | SSR    |
| 8 | $SrTi_{0.85}Fe_{0.15}O_3$                      | 917                             |            |           | 0.21                 | 1573                | air                  | SSR    |
| 8 | $SrTi_{0.85}Fe_{0.15}O_3$                      | 943                             |            |           | 0.21                 | 1573                | air                  | SSR    |
| 8 | $SrTi_{0.85}Fe_{0.15}O_3$                      | 976                             |            |           | 0.21                 | 1573                | air                  | SSR    |
| 8 | $SrTi_{0.85}Fe_{0.15}O_3$                      | 995                             |            |           | 0.21                 | 1573                | air                  | SSR    |
| 8 | $SrTi_{0.85}Fe_{0.15}O_3$                      | 1010                            |            |           | 0.21                 | 1573                | air                  | SSR    |
| 8 | $SrTi_{0.85}Fe_{0.15}O_3$                      | 1047                            |            |           | 0.21                 | 1573                | air                  | SSR    |
| 8 | $SrTi_{0.85}Fe_{0.15}O_3$                      | 1081                            |            |           | 0.21                 | 1573                | air                  | SSR    |

SSR: Solid state reaction

CS: Chemical solution

|    |                                                                                        |      |       |      |         |                |     |
|----|----------------------------------------------------------------------------------------|------|-------|------|---------|----------------|-----|
| 8  | SrTi <sub>0.85</sub> Fe <sub>0.15</sub> O <sub>3</sub>                                 | 976  |       | 0.21 | 1573    | air            | SSR |
| 8  | SrTi <sub>0.85</sub> Fe <sub>0.15</sub> O <sub>3</sub>                                 | 995  |       | 0.21 | 1573    | air            | SSR |
| 8  | SrTi <sub>0.85</sub> Fe <sub>0.15</sub> O <sub>3</sub>                                 | 1010 |       | 0.21 | 1573    | air            | SSR |
| 8  | SrTi <sub>0.85</sub> Fe <sub>0.15</sub> O <sub>3</sub>                                 | 1047 |       | 0.21 | 1573    | air            | SSR |
| 8  | SrTi <sub>0.85</sub> Fe <sub>0.15</sub> O <sub>3</sub>                                 | 1081 |       | 0.21 | 1573    | air            | SSR |
| 9  | Ba <sub>0.3</sub> Sr <sub>0.7</sub> Co <sub>0.8</sub> Fe <sub>0.2</sub> O <sub>3</sub> | 364  |       | 0.21 | #VALUE! | air            | CS  |
| 9  | Ba <sub>0.3</sub> Sr <sub>0.7</sub> Co <sub>0.8</sub> Fe <sub>0.2</sub> O <sub>3</sub> | 400  |       | 0.21 | #VALUE! | air            | CS  |
| 9  | Ba <sub>0.3</sub> Sr <sub>0.7</sub> Co <sub>0.8</sub> Fe <sub>0.2</sub> O <sub>3</sub> | 444  |       | 0.21 | #VALUE! | air            | CS  |
| 9  | Ba <sub>0.3</sub> Sr <sub>0.7</sub> Co <sub>0.8</sub> Fe <sub>0.2</sub> O <sub>3</sub> | 500  |       | 0.21 | #VALUE! | air            | CS  |
| 9  | Ba <sub>0.3</sub> Sr <sub>0.7</sub> Co <sub>0.8</sub> Fe <sub>0.2</sub> O <sub>3</sub> | 571  |       | 0.21 | #VALUE! | air            | CS  |
| 9  | Ba <sub>0.3</sub> Sr <sub>0.7</sub> Co <sub>0.8</sub> Fe <sub>0.2</sub> O <sub>3</sub> | 667  |       | 0.21 | #VALUE! | air            | CS  |
| 9  | Ba <sub>0.3</sub> Sr <sub>0.7</sub> Co <sub>0.8</sub> Fe <sub>0.2</sub> O <sub>3</sub> | 800  |       | 0.21 | #VALUE! | air            | CS  |
| 9  | Ba <sub>0.3</sub> Sr <sub>0.7</sub> Co <sub>0.8</sub> Fe <sub>0.2</sub> O <sub>3</sub> | 1000 |       | 0.21 | #VALUE! | air            | CS  |
| 10 | Ba <sub>0.4</sub> Sr <sub>0.6</sub> Co <sub>0.8</sub> Fe <sub>0.2</sub> O <sub>3</sub> | 364  |       | 0.21 | #VALUE! | air            | CS  |
| 10 | Ba <sub>0.4</sub> Sr <sub>0.6</sub> Co <sub>0.8</sub> Fe <sub>0.2</sub> O <sub>3</sub> | 400  |       | 0.21 | #VALUE! | air            | CS  |
| 10 | Ba <sub>0.4</sub> Sr <sub>0.6</sub> Co <sub>0.8</sub> Fe <sub>0.2</sub> O <sub>3</sub> | 444  |       | 0.21 | #VALUE! | air            | CS  |
| 10 | Ba <sub>0.4</sub> Sr <sub>0.6</sub> Co <sub>0.8</sub> Fe <sub>0.2</sub> O <sub>3</sub> | 500  |       | 0.21 | #VALUE! | air            | CS  |
| 10 | Ba <sub>0.4</sub> Sr <sub>0.6</sub> Co <sub>0.8</sub> Fe <sub>0.2</sub> O <sub>3</sub> | 571  |       | 0.21 | #VALUE! | air            | CS  |
| 10 | Ba <sub>0.4</sub> Sr <sub>0.6</sub> Co <sub>0.8</sub> Fe <sub>0.2</sub> O <sub>3</sub> | 667  |       | 0.21 | #VALUE! | air            | CS  |
| 10 | Ba <sub>0.4</sub> Sr <sub>0.6</sub> Co <sub>0.8</sub> Fe <sub>0.2</sub> O <sub>3</sub> | 800  |       | 0.21 | #VALUE! | air            | CS  |
| 10 | Ba <sub>0.4</sub> Sr <sub>0.6</sub> Co <sub>0.8</sub> Fe <sub>0.2</sub> O <sub>3</sub> | 1000 |       | 0.21 | #VALUE! | air            | CS  |
| 11 | Ba <sub>0.5</sub> Sr <sub>0.5</sub> Co <sub>0.8</sub> Fe <sub>0.2</sub> O <sub>3</sub> | 364  |       | 0.21 | #VALUE! | air            | CS  |
| 11 | Ba <sub>0.5</sub> Sr <sub>0.5</sub> Co <sub>0.8</sub> Fe <sub>0.2</sub> O <sub>3</sub> | 400  |       | 0.21 | #VALUE! | air            | CS  |
| 11 | Ba <sub>0.5</sub> Sr <sub>0.5</sub> Co <sub>0.8</sub> Fe <sub>0.2</sub> O <sub>3</sub> | 444  |       | 0.21 | #VALUE! | air            | CS  |
| 11 | Ba <sub>0.5</sub> Sr <sub>0.5</sub> Co <sub>0.8</sub> Fe <sub>0.2</sub> O <sub>3</sub> | 500  |       | 0.21 | #VALUE! | air            | CS  |
| 11 | Ba <sub>0.5</sub> Sr <sub>0.5</sub> Co <sub>0.8</sub> Fe <sub>0.2</sub> O <sub>3</sub> | 571  |       | 0.21 | #VALUE! | air            | CS  |
| 11 | Ba <sub>0.5</sub> Sr <sub>0.5</sub> Co <sub>0.8</sub> Fe <sub>0.2</sub> O <sub>3</sub> | 667  |       | 0.21 | #VALUE! | air            | CS  |
| 11 | Ba <sub>0.5</sub> Sr <sub>0.5</sub> Co <sub>0.8</sub> Fe <sub>0.2</sub> O <sub>3</sub> | 800  |       | 0.21 | #VALUE! | air            | CS  |
| 11 | Ba <sub>0.5</sub> Sr <sub>0.5</sub> Co <sub>0.8</sub> Fe <sub>0.2</sub> O <sub>3</sub> | 1000 |       | 0.21 | #VALUE! | air            | CS  |
| 12 | Ba <sub>0.6</sub> Sr <sub>0.4</sub> Co <sub>0.8</sub> Fe <sub>0.2</sub> O <sub>3</sub> | 364  |       | 0.21 | #VALUE! | air            | CS  |
| 12 | Ba <sub>0.6</sub> Sr <sub>0.4</sub> Co <sub>0.8</sub> Fe <sub>0.2</sub> O <sub>3</sub> | 400  |       | 0.21 | #VALUE! | air            | CS  |
| 12 | Ba <sub>0.6</sub> Sr <sub>0.4</sub> Co <sub>0.8</sub> Fe <sub>0.2</sub> O <sub>3</sub> | 444  |       | 0.21 | #VALUE! | air            | CS  |
| 12 | Ba <sub>0.6</sub> Sr <sub>0.4</sub> Co <sub>0.8</sub> Fe <sub>0.2</sub> O <sub>3</sub> | 500  |       | 0.21 | #VALUE! | air            | CS  |
| 12 | Ba <sub>0.6</sub> Sr <sub>0.4</sub> Co <sub>0.8</sub> Fe <sub>0.2</sub> O <sub>3</sub> | 571  |       | 0.21 | #VALUE! | air            | CS  |
| 12 | Ba <sub>0.6</sub> Sr <sub>0.4</sub> Co <sub>0.8</sub> Fe <sub>0.2</sub> O <sub>3</sub> | 667  |       | 0.21 | #VALUE! | air            | CS  |
| 12 | Ba <sub>0.6</sub> Sr <sub>0.4</sub> Co <sub>0.8</sub> Fe <sub>0.2</sub> O <sub>3</sub> | 800  |       | 0.21 | #VALUE! | air            | CS  |
| 12 | Ba <sub>0.6</sub> Sr <sub>0.4</sub> Co <sub>0.8</sub> Fe <sub>0.2</sub> O <sub>3</sub> | 1000 |       | 0.21 | #VALUE! | air            | CS  |
| 13 | BaPr <sub>0.8</sub> Gd <sub>0.2</sub> O <sub>3</sub>                                   | 673  |       | 0.21 | 1923    | air            | SSR |
| 13 | BaPr <sub>0.8</sub> Gd <sub>0.2</sub> O <sub>3</sub>                                   | 773  |       | 0.21 | 1923    | air            | SSR |
| 13 | BaPr <sub>0.8</sub> Gd <sub>0.2</sub> O <sub>3</sub>                                   | 873  |       | 0.21 | 1923    | air            | SSR |
| 13 | BaPr <sub>0.8</sub> Gd <sub>0.2</sub> O <sub>3</sub>                                   | 973  |       | 0.21 | 1923    | air            | SSR |
| 13 | BaPr <sub>0.8</sub> Gd <sub>0.2</sub> O <sub>3</sub>                                   | 1073 |       | 0.21 | 1923    | air            | SSR |
| 14 | BaPr <sub>0.7</sub> Gd <sub>0.3</sub> O <sub>3</sub>                                   | 673  |       | 0.21 | 1923    | air            | SSR |
| 14 | BaPr <sub>0.7</sub> Gd <sub>0.3</sub> O <sub>3</sub>                                   | 773  |       | 0.21 | 1923    | air            | SSR |
| 14 | BaPr <sub>0.7</sub> Gd <sub>0.3</sub> O <sub>3</sub>                                   | 873  |       | 0.21 | 1923    | air            | SSR |
| 14 | BaPr <sub>0.7</sub> Gd <sub>0.3</sub> O <sub>3</sub>                                   | 973  |       | 0.21 | 1923    | air            | SSR |
| 14 | BaPr <sub>0.7</sub> Gd <sub>0.3</sub> O <sub>3</sub>                                   | 1073 |       | 0.21 | 1923    | air            | SSR |
| 15 | BaPr <sub>0.6</sub> Gd <sub>0.4</sub> O <sub>3</sub>                                   | 673  |       | 0.21 | 1923    | air            | SSR |
| 15 | BaPr <sub>0.6</sub> Gd <sub>0.4</sub> O <sub>3</sub>                                   | 773  |       | 0.21 | 1923    | air            | SSR |
| 15 | BaPr <sub>0.6</sub> Gd <sub>0.4</sub> O <sub>3</sub>                                   | 873  |       | 0.21 | 1923    | air            | SSR |
| 15 | BaPr <sub>0.6</sub> Gd <sub>0.4</sub> O <sub>3</sub>                                   | 973  |       | 0.21 | 1923    | air            | SSR |
| 15 | BaPr <sub>0.6</sub> Gd <sub>0.4</sub> O <sub>3</sub>                                   | 1073 |       | 0.21 | 1923    | air            | SSR |
| 16 | BaCe <sub>0.8</sub> Gd <sub>0.2</sub> O <sub>3</sub>                                   | 673  |       | 0.21 | 1923    | air            | SSR |
| 16 | BaCe <sub>0.8</sub> Gd <sub>0.2</sub> O <sub>3</sub>                                   | 773  |       | 0.21 | 1923    | air            | SSR |
| 16 | BaCe <sub>0.8</sub> Gd <sub>0.2</sub> O <sub>3</sub>                                   | 873  |       | 0.21 | 1923    | air            | SSR |
| 16 | BaCe <sub>0.8</sub> Gd <sub>0.2</sub> O <sub>3</sub>                                   | 973  |       | 0.21 | 1923    | air            | SSR |
| 16 | BaCe <sub>0.8</sub> Gd <sub>0.2</sub> O <sub>3</sub>                                   | 1073 |       | 0.21 | 1923    | air            | SSR |
| 17 | BaZr <sub>0.8</sub> In <sub>0.2</sub> O <sub>3</sub>                                   | 873  | 0.019 | 0.21 | 1873    | O <sub>2</sub> | CS  |
| 17 | BaZr <sub>0.8</sub> In <sub>0.2</sub> O <sub>3</sub>                                   | 973  | 0.019 | 0.21 | 1873    | O <sub>2</sub> | CS  |
| 17 | BaZr <sub>0.8</sub> In <sub>0.2</sub> O <sub>3</sub>                                   | 1073 | 0.019 | 0.21 | 1873    | O <sub>2</sub> | CS  |
| 18 | BaZr <sub>0.8</sub> Lu <sub>0.2</sub> O <sub>3</sub>                                   | 873  | 0.019 | 0.21 | 1873    | O <sub>2</sub> | CS  |
| 18 | BaZr <sub>0.8</sub> Lu <sub>0.2</sub> O <sub>3</sub>                                   | 973  | 0.019 | 0.21 | 1873    | O <sub>2</sub> | CS  |
| 18 | BaZr <sub>0.8</sub> Lu <sub>0.2</sub> O <sub>3</sub>                                   | 1073 | 0.019 | 0.21 | 1873    | O <sub>2</sub> | CS  |
| 19 | SrCo <sub>0.95</sub> Nb <sub>0.05</sub> O <sub>3</sub>                                 | 673  |       | 0.21 | 1473    | air            | SSR |
| 19 | SrCo <sub>0.95</sub> Nb <sub>0.05</sub> O <sub>3</sub>                                 | 723  |       | 0.21 | 1473    | air            | SSR |
| 19 | SrCo <sub>0.95</sub> Nb <sub>0.05</sub> O <sub>3</sub>                                 | 773  |       | 0.21 | 1473    | air            | SSR |
| 19 | SrCo <sub>0.95</sub> Nb <sub>0.05</sub> O <sub>3</sub>                                 | 823  |       | 0.21 | 1473    | air            | SSR |
| 19 | SrCo <sub>0.95</sub> Nb <sub>0.05</sub> O <sub>3</sub>                                 | 873  |       | 0.21 | 1473    | air            | SSR |
| 19 | SrCo <sub>0.95</sub> Nb <sub>0.05</sub> O <sub>3</sub>                                 | 923  |       | 0.21 | 1473    | air            | SSR |
| 19 | SrCo <sub>0.95</sub> Nb <sub>0.05</sub> O <sub>3</sub>                                 | 973  |       | 0.21 | 1473    | air            | SSR |
| 19 | SrCo <sub>0.95</sub> Nb <sub>0.05</sub> O <sub>3</sub>                                 | 1023 |       | 0.21 | 1473    | air            | SSR |
| 19 | SrCo <sub>0.95</sub> Nb <sub>0.05</sub> O <sub>3</sub>                                 | 1073 |       | 0.21 | 1473    | air            | SSR |
| 20 | SrCo <sub>0.90</sub> Nb <sub>0.1</sub> O <sub>3</sub>                                  | 673  |       | 0.21 | 1473    | air            | SSR |
| 20 | SrCo <sub>0.90</sub> Nb <sub>0.1</sub> O <sub>3</sub>                                  | 723  |       | 0.21 | 1473    | air            | SSR |



|    |                                                                                           |      |       |  |      |         |                          |     |
|----|-------------------------------------------------------------------------------------------|------|-------|--|------|---------|--------------------------|-----|
| 31 | BaCe <sub>0.8</sub> Y <sub>0.2</sub> O <sub>3</sub>                                       | 973  | 0.019 |  | 0.21 | 1873    | O <sub>2</sub>           | CS  |
| 31 | BaCe <sub>0.8</sub> Y <sub>0.2</sub> O <sub>3</sub>                                       | 1073 | 0.019 |  | 0.21 | 1873    | O <sub>2</sub>           | CS  |
| 32 | BaCe <sub>0.9</sub> Y <sub>0.1</sub> O <sub>3</sub>                                       | 1073 | 0.019 |  | 0.21 | 1873    | O <sub>2</sub>           | CS  |
| 33 | BaZr <sub>0.7</sub> Yb <sub>0.2</sub> In <sub>0.1</sub> O <sub>3</sub>                    | 873  | 0.019 |  | 0.21 | 1873    | O <sub>2</sub>           | CS  |
| 33 | BaZr <sub>0.7</sub> Yb <sub>0.2</sub> In <sub>0.1</sub> O <sub>3</sub>                    | 973  | 0.019 |  | 0.21 | 1873    | O <sub>2</sub>           | CS  |
| 33 | BaZr <sub>0.7</sub> Yb <sub>0.2</sub> In <sub>0.1</sub> O <sub>3</sub>                    | 1073 | 0.019 |  | 0.21 | 1873    | O <sub>2</sub>           | CS  |
| 34 | BaZr <sub>0.7</sub> Yb <sub>0.2</sub> Sc <sub>0.1</sub> O <sub>3</sub>                    | 873  | 0.019 |  | 0.21 | 1873    | O <sub>2</sub>           | CS  |
| 35 | BaZr <sub>0.8</sub> Yb <sub>0.2</sub> O <sub>3</sub>                                      | 873  | 0.019 |  | 0.21 | 1873    | O <sub>2</sub>           | CS  |
| 35 | BaZr <sub>0.8</sub> Yb <sub>0.2</sub> O <sub>3</sub>                                      | 973  | 0.019 |  | 0.21 | 1873    | O <sub>2</sub>           | CS  |
| 35 | BaZr <sub>0.8</sub> Yb <sub>0.2</sub> O <sub>3</sub>                                      | 1073 | 0.019 |  | 0.21 | 1873    | O <sub>2</sub>           | CS  |
| 36 | Ba <sub>0.9</sub> Sr <sub>0.1</sub> Zr <sub>0.8</sub> Yb <sub>0.2</sub> O <sub>3</sub>    | 873  | 0.019 |  | 0.21 | 1873    | O <sub>2</sub>           | CS  |
| 36 | Ba <sub>0.9</sub> Sr <sub>0.1</sub> Zr <sub>0.8</sub> Yb <sub>0.2</sub> O <sub>3</sub>    | 1073 | 0.019 |  | 0.21 | 1873    | O <sub>2</sub>           | CS  |
| 37 | SrCe <sub>0.97</sub> Yb <sub>0.03</sub> O <sub>3</sub>                                    | 773  | 0.019 |  | 0.21 | 1873    | O <sub>2</sub>           | CS  |
| 37 | SrCe <sub>0.97</sub> Yb <sub>0.03</sub> O <sub>3</sub>                                    | 823  | 0.019 |  | 0.21 | 1873    | O <sub>2</sub>           | CS  |
| 37 | SrCe <sub>0.97</sub> Yb <sub>0.03</sub> O <sub>3</sub>                                    | 873  | 0.019 |  | 0.21 | 1873    | O <sub>2</sub>           | CS  |
| 37 | SrCe <sub>0.97</sub> Yb <sub>0.03</sub> O <sub>3</sub>                                    | 923  | 0.019 |  | 0.21 | 1873    | O <sub>2</sub>           | CS  |
| 37 | SrCe <sub>0.97</sub> Yb <sub>0.03</sub> O <sub>3</sub>                                    | 973  | 0.019 |  | 0.21 | 1873    | O <sub>2</sub>           | CS  |
| 37 | SrCe <sub>0.97</sub> Yb <sub>0.03</sub> O <sub>3</sub>                                    | 1023 | 0.019 |  | 0.21 | 1873    | O <sub>2</sub>           | CS  |
| 37 | SrCe <sub>0.97</sub> Yb <sub>0.03</sub> O <sub>3</sub>                                    | 1073 | 0.019 |  | 0.21 | 1873    | O <sub>2</sub>           | CS  |
| 38 | BaCe <sub>0.6</sub> Zr <sub>0.2</sub> Y <sub>0.2</sub> O <sub>3</sub>                     | 873  | 0.019 |  | 0.21 | 1873    | O <sub>2</sub>           | CS  |
| 38 | BaCe <sub>0.6</sub> Zr <sub>0.2</sub> Y <sub>0.2</sub> O <sub>3</sub>                     | 973  | 0.019 |  | 0.21 | 1873    | O <sub>2</sub>           | CS  |
| 38 | BaCe <sub>0.6</sub> Zr <sub>0.2</sub> Y <sub>0.2</sub> O <sub>3</sub>                     | 1073 | 0.019 |  | 0.21 | 1873    | O <sub>2</sub>           | CS  |
| 39 | BaCe <sub>0.7</sub> Zr <sub>0.1</sub> Y <sub>0.1</sub> Yb <sub>0.1</sub> O <sub>3</sub>   | 873  | 0.019 |  | 0.21 | 1873    | O <sub>2</sub>           | CS  |
| 39 | BaCe <sub>0.7</sub> Zr <sub>0.1</sub> Y <sub>0.1</sub> Yb <sub>0.1</sub> O <sub>3</sub>   | 973  | 0.019 |  | 0.21 | 1873    | O <sub>2</sub>           | CS  |
| 39 | BaCe <sub>0.7</sub> Zr <sub>0.1</sub> Y <sub>0.1</sub> Yb <sub>0.1</sub> O <sub>3</sub>   | 1073 | 0.019 |  | 0.21 | 1873    | O <sub>2</sub>           | CS  |
| 40 | BaCe <sub>0.45</sub> Zr <sub>0.35</sub> Y <sub>0.1</sub> Yb <sub>0.1</sub> O <sub>3</sub> | 873  | 0.019 |  | 0.21 | 1873    | O <sub>2</sub>           | CS  |
| 40 | BaCe <sub>0.45</sub> Zr <sub>0.35</sub> Y <sub>0.1</sub> Yb <sub>0.1</sub> O <sub>3</sub> | 973  | 0.019 |  | 0.21 | 1873    | O <sub>2</sub>           | CS  |
| 40 | BaCe <sub>0.45</sub> Zr <sub>0.35</sub> Y <sub>0.1</sub> Yb <sub>0.1</sub> O <sub>3</sub> | 1073 | 0.019 |  | 0.21 | 1873    | O <sub>2</sub>           | CS  |
| 41 | LaFe <sub>0.9</sub> Ni <sub>0.1</sub> O <sub>3</sub>                                      | 714  |       |  | 0.21 | #VALUE! | air                      | SSR |
| 41 | LaFe <sub>0.9</sub> Ni <sub>0.1</sub> O <sub>3</sub>                                      | 769  |       |  | 0.21 | #VALUE! | air                      | SSR |
| 41 | LaFe <sub>0.9</sub> Ni <sub>0.1</sub> O <sub>3</sub>                                      | 833  |       |  | 0.21 | #VALUE! | air                      | SSR |
| 41 | LaFe <sub>0.9</sub> Ni <sub>0.1</sub> O <sub>3</sub>                                      | 909  |       |  | 0.21 | #VALUE! | air                      | SSR |
| 41 | LaFe <sub>0.9</sub> Ni <sub>0.1</sub> O <sub>3</sub>                                      | 1000 |       |  | 0.21 | #VALUE! | air                      | SSR |
| 41 | LaFe <sub>0.9</sub> Ni <sub>0.1</sub> O <sub>3</sub>                                      | 1111 |       |  | 0.21 | #VALUE! | air                      | SSR |
| 41 | LaFe <sub>0.9</sub> Ni <sub>0.1</sub> O <sub>3</sub>                                      | 1250 |       |  | 0.21 | #VALUE! | air                      | SSR |
| 42 | LaFe <sub>0.8</sub> Ni <sub>0.2</sub> O <sub>3</sub>                                      | 556  |       |  | 0.21 | #VALUE! | air                      | SSR |
| 42 | LaFe <sub>0.8</sub> Ni <sub>0.2</sub> O <sub>3</sub>                                      | 588  |       |  | 0.21 | #VALUE! | air                      | SSR |
| 42 | LaFe <sub>0.8</sub> Ni <sub>0.2</sub> O <sub>3</sub>                                      | 625  |       |  | 0.21 | #VALUE! | air                      | SSR |
| 42 | LaFe <sub>0.8</sub> Ni <sub>0.2</sub> O <sub>3</sub>                                      | 667  |       |  | 0.21 | #VALUE! | air                      | SSR |
| 42 | LaFe <sub>0.8</sub> Ni <sub>0.2</sub> O <sub>3</sub>                                      | 714  |       |  | 0.21 | #VALUE! | air                      | SSR |
| 42 | LaFe <sub>0.8</sub> Ni <sub>0.2</sub> O <sub>3</sub>                                      | 769  |       |  | 0.21 | #VALUE! | air                      | SSR |
| 42 | LaFe <sub>0.8</sub> Ni <sub>0.2</sub> O <sub>3</sub>                                      | 833  |       |  | 0.21 | #VALUE! | air                      | SSR |
| 42 | LaFe <sub>0.8</sub> Ni <sub>0.2</sub> O <sub>3</sub>                                      | 909  |       |  | 0.21 | #VALUE! | air                      | SSR |
| 42 | LaFe <sub>0.8</sub> Ni <sub>0.2</sub> O <sub>3</sub>                                      | 1000 |       |  | 0.21 | #VALUE! | air                      | SSR |
| 42 | LaFe <sub>0.8</sub> Ni <sub>0.2</sub> O <sub>3</sub>                                      | 1111 |       |  | 0.21 | #VALUE! | air                      | SSR |
| 42 | LaFe <sub>0.8</sub> Ni <sub>0.2</sub> O <sub>3</sub>                                      | 1250 |       |  | 0.21 | #VALUE! | air                      | SSR |
| 43 | LaFe <sub>0.7</sub> Ni <sub>0.3</sub> O <sub>3</sub>                                      | 556  |       |  | 0.21 | #VALUE! | air                      | SSR |
| 43 | LaFe <sub>0.7</sub> Ni <sub>0.3</sub> O <sub>3</sub>                                      | 588  |       |  | 0.21 | #VALUE! | air                      | SSR |
| 43 | LaFe <sub>0.7</sub> Ni <sub>0.3</sub> O <sub>3</sub>                                      | 625  |       |  | 0.21 | #VALUE! | air                      | SSR |
| 43 | LaFe <sub>0.7</sub> Ni <sub>0.3</sub> O <sub>3</sub>                                      | 667  |       |  | 0.21 | #VALUE! | air                      | SSR |
| 43 | LaFe <sub>0.7</sub> Ni <sub>0.3</sub> O <sub>3</sub>                                      | 714  |       |  | 0.21 | #VALUE! | air                      | SSR |
| 43 | LaFe <sub>0.7</sub> Ni <sub>0.3</sub> O <sub>3</sub>                                      | 769  |       |  | 0.21 | #VALUE! | air                      | SSR |
| 43 | LaFe <sub>0.7</sub> Ni <sub>0.3</sub> O <sub>3</sub>                                      | 833  |       |  | 0.21 | #VALUE! | air                      | SSR |
| 43 | LaFe <sub>0.7</sub> Ni <sub>0.3</sub> O <sub>3</sub>                                      | 909  |       |  | 0.21 | #VALUE! | air                      | SSR |
| 43 | LaFe <sub>0.7</sub> Ni <sub>0.3</sub> O <sub>3</sub>                                      | 1000 |       |  | 0.21 | #VALUE! | air                      | SSR |
| 43 | LaFe <sub>0.7</sub> Ni <sub>0.3</sub> O <sub>3</sub>                                      | 1111 |       |  | 0.21 | #VALUE! | air                      | SSR |
| 43 | LaFe <sub>0.7</sub> Ni <sub>0.3</sub> O <sub>3</sub>                                      | 1250 |       |  | 0.21 | #VALUE! | air                      | SSR |
| 44 | LaFe <sub>0.6</sub> Ni <sub>0.4</sub> O <sub>3</sub>                                      | 556  |       |  | 0.21 | #VALUE! | air                      | SSR |
| 44 | LaFe <sub>0.6</sub> Ni <sub>0.4</sub> O <sub>3</sub>                                      | 588  |       |  | 0.21 | #VALUE! | air                      | SSR |
| 44 | LaFe <sub>0.6</sub> Ni <sub>0.4</sub> O <sub>3</sub>                                      | 625  |       |  | 0.21 | #VALUE! | air                      | SSR |
| 44 | LaFe <sub>0.6</sub> Ni <sub>0.4</sub> O <sub>3</sub>                                      | 667  |       |  | 0.21 | #VALUE! | air                      | SSR |
| 44 | LaFe <sub>0.6</sub> Ni <sub>0.4</sub> O <sub>3</sub>                                      | 714  |       |  | 0.21 | #VALUE! | air                      | SSR |
| 44 | LaFe <sub>0.6</sub> Ni <sub>0.4</sub> O <sub>3</sub>                                      | 769  |       |  | 0.21 | #VALUE! | air                      | SSR |
| 44 | LaFe <sub>0.6</sub> Ni <sub>0.4</sub> O <sub>3</sub>                                      | 833  |       |  | 0.21 | #VALUE! | air                      | SSR |
| 44 | LaFe <sub>0.6</sub> Ni <sub>0.4</sub> O <sub>3</sub>                                      | 909  |       |  | 0.21 | #VALUE! | air                      | SSR |
| 44 | LaFe <sub>0.6</sub> Ni <sub>0.4</sub> O <sub>3</sub>                                      | 1000 |       |  | 0.21 | #VALUE! | air                      | SSR |
| 44 | LaFe <sub>0.6</sub> Ni <sub>0.4</sub> O <sub>3</sub>                                      | 1111 |       |  | 0.21 | #VALUE! | air                      | SSR |
| 44 | LaFe <sub>0.6</sub> Ni <sub>0.4</sub> O <sub>3</sub>                                      | 1250 |       |  | 0.21 | #VALUE! | air                      | SSR |
| 45 | La <sub>0.6</sub> Sr <sub>0.4</sub> Co <sub>0.2</sub> Fe <sub>0.8</sub> O <sub>3</sub>    | 444  |       |  | 0.21 | #VALUE! |                          | PLD |
| 45 | La <sub>0.6</sub> Sr <sub>0.4</sub> Co <sub>0.2</sub> Fe <sub>0.8</sub> O <sub>3</sub>    | 500  |       |  | 0.21 | #VALUE! |                          | PLD |
| 45 | La <sub>0.6</sub> Sr <sub>0.4</sub> Co <sub>0.2</sub> Fe <sub>0.8</sub> O <sub>3</sub>    | 571  |       |  | 0.21 | #VALUE! |                          | PLD |
| 45 | La <sub>0.6</sub> Sr <sub>0.4</sub> Co <sub>0.2</sub> Fe <sub>0.8</sub> O <sub>3</sub>    | 667  |       |  | 0.21 | #VALUE! |                          | PLD |
| 45 | La <sub>0.6</sub> Sr <sub>0.4</sub> Co <sub>0.2</sub> Fe <sub>0.8</sub> O <sub>3</sub>    | 800  |       |  | 0.21 | #VALUE! |                          | PLD |
| 46 | La <sub>0.3</sub> Sr <sub>0.7</sub> Co <sub>0.3</sub> Ti <sub>0.7</sub> O <sub>3</sub>    | 773  |       |  | 0.21 | 1773    | 5 vol% hydrogen in argon | SSR |





|    |                                                                                          |      |       |      |      |                          |     |
|----|------------------------------------------------------------------------------------------|------|-------|------|------|--------------------------|-----|
| 63 | LaSc <sub>0.85</sub> Mg <sub>0.15</sub> O <sub>3</sub>                                   | 1123 |       | 0.21 | 1673 | air                      | SSR |
| 63 | LaSc <sub>0.85</sub> Mg <sub>0.15</sub> O <sub>3</sub>                                   | 1173 |       | 0.21 | 1673 | air                      | SSR |
| 63 | LaSc <sub>0.85</sub> Mg <sub>0.15</sub> O <sub>3</sub>                                   | 1223 |       | 0.21 | 1673 | air                      | SSR |
| 63 | LaSc <sub>0.85</sub> Mg <sub>0.15</sub> O <sub>3</sub>                                   | 1273 |       | 0.21 | 1673 | air                      | SSR |
| 64 | LaSc <sub>0.8</sub> Mg <sub>0.2</sub> O <sub>3</sub>                                     | 873  |       | 0.21 | 1673 | air                      | SSR |
| 64 | LaSc <sub>0.8</sub> Mg <sub>0.2</sub> O <sub>3</sub>                                     | 923  |       | 0.21 | 1673 | air                      | SSR |
| 64 | LaSc <sub>0.8</sub> Mg <sub>0.2</sub> O <sub>3</sub>                                     | 973  |       | 0.21 | 1673 | air                      | SSR |
| 64 | LaSc <sub>0.8</sub> Mg <sub>0.2</sub> O <sub>3</sub>                                     | 1023 |       | 0.21 | 1673 | air                      | SSR |
| 64 | LaSc <sub>0.8</sub> Mg <sub>0.2</sub> O <sub>3</sub>                                     | 1073 |       | 0.21 | 1673 | air                      | SSR |
| 64 | LaSc <sub>0.8</sub> Mg <sub>0.2</sub> O <sub>3</sub>                                     | 1123 |       | 0.21 | 1673 | air                      | SSR |
| 64 | LaSc <sub>0.8</sub> Mg <sub>0.2</sub> O <sub>3</sub>                                     | 1173 |       | 0.21 | 1673 | air                      | SSR |
| 64 | LaSc <sub>0.8</sub> Mg <sub>0.2</sub> O <sub>3</sub>                                     | 1223 |       | 0.21 | 1673 | air                      | SSR |
| 64 | LaSc <sub>0.8</sub> Mg <sub>0.2</sub> O <sub>3</sub>                                     | 1273 |       | 0.21 | 1673 | air                      | SSR |
| 65 | La <sub>0.75</sub> Sr <sub>0.25</sub> Cr <sub>0.5</sub> Mn <sub>0.5</sub> O <sub>3</sub> | 773  |       | 0.21 | 1873 | air                      | SSR |
| 65 | La <sub>0.75</sub> Sr <sub>0.25</sub> Cr <sub>0.5</sub> Mn <sub>0.5</sub> O <sub>3</sub> | 823  |       | 0.21 | 1873 | air                      | SSR |
| 65 | La <sub>0.75</sub> Sr <sub>0.25</sub> Cr <sub>0.5</sub> Mn <sub>0.5</sub> O <sub>3</sub> | 873  |       | 0.21 | 1873 | air                      | SSR |
| 65 | La <sub>0.75</sub> Sr <sub>0.25</sub> Cr <sub>0.5</sub> Mn <sub>0.5</sub> O <sub>3</sub> | 923  |       | 0.21 | 1873 | air                      | SSR |
| 65 | La <sub>0.75</sub> Sr <sub>0.25</sub> Cr <sub>0.5</sub> Mn <sub>0.5</sub> O <sub>3</sub> | 973  |       | 0.21 | 1873 | air                      | SSR |
| 65 | La <sub>0.75</sub> Sr <sub>0.25</sub> Cr <sub>0.5</sub> Mn <sub>0.5</sub> O <sub>3</sub> | 1023 |       | 0.21 | 1873 | air                      | SSR |
| 65 | La <sub>0.75</sub> Sr <sub>0.25</sub> Cr <sub>0.5</sub> Mn <sub>0.5</sub> O <sub>3</sub> | 1073 |       | 0.21 | 1873 | air                      | SSR |
| 65 | La <sub>0.75</sub> Sr <sub>0.25</sub> Cr <sub>0.5</sub> Mn <sub>0.5</sub> O <sub>3</sub> | 1123 |       | 0.21 | 1873 | air                      | SSR |
| 66 | Pr <sub>0.7</sub> Sr <sub>0.3</sub> Co <sub>0.8</sub> Mn <sub>0.2</sub> O <sub>3</sub>   | 673  |       | 0.21 | 1573 | air                      | CS  |
| 66 | Pr <sub>0.7</sub> Sr <sub>0.3</sub> Co <sub>0.8</sub> Mn <sub>0.2</sub> O <sub>3</sub>   | 723  |       | 0.21 | 1573 | air                      | CS  |
| 66 | Pr <sub>0.7</sub> Sr <sub>0.3</sub> Co <sub>0.8</sub> Mn <sub>0.2</sub> O <sub>3</sub>   | 773  |       | 0.21 | 1573 | air                      | CS  |
| 66 | Pr <sub>0.7</sub> Sr <sub>0.3</sub> Co <sub>0.8</sub> Mn <sub>0.2</sub> O <sub>3</sub>   | 823  |       | 0.21 | 1573 | air                      | CS  |
| 66 | Pr <sub>0.7</sub> Sr <sub>0.3</sub> Co <sub>0.8</sub> Mn <sub>0.2</sub> O <sub>3</sub>   | 873  |       | 0.21 | 1573 | air                      | CS  |
| 66 | Pr <sub>0.7</sub> Sr <sub>0.3</sub> Co <sub>0.8</sub> Mn <sub>0.2</sub> O <sub>3</sub>   | 923  |       | 0.21 | 1573 | air                      | CS  |
| 66 | Pr <sub>0.7</sub> Sr <sub>0.3</sub> Co <sub>0.8</sub> Mn <sub>0.2</sub> O <sub>3</sub>   | 973  |       | 0.21 | 1573 | air                      | CS  |
| 66 | Pr <sub>0.7</sub> Sr <sub>0.3</sub> Co <sub>0.8</sub> Mn <sub>0.2</sub> O <sub>3</sub>   | 1023 |       | 0.21 | 1573 | air                      | CS  |
| 66 | Pr <sub>0.7</sub> Sr <sub>0.3</sub> Co <sub>0.8</sub> Mn <sub>0.2</sub> O <sub>3</sub>   | 1073 |       | 0.21 | 1573 | air                      | CS  |
| 67 | Pr <sub>0.7</sub> Sr <sub>0.3</sub> Co <sub>0.6</sub> Mn <sub>0.4</sub> O <sub>3</sub>   | 673  |       | 0.21 | 1573 | air                      | CS  |
| 67 | Pr <sub>0.7</sub> Sr <sub>0.3</sub> Co <sub>0.6</sub> Mn <sub>0.4</sub> O <sub>3</sub>   | 723  |       | 0.21 | 1573 | air                      | CS  |
| 67 | Pr <sub>0.7</sub> Sr <sub>0.3</sub> Co <sub>0.6</sub> Mn <sub>0.4</sub> O <sub>3</sub>   | 773  |       | 0.21 | 1573 | air                      | CS  |
| 67 | Pr <sub>0.7</sub> Sr <sub>0.3</sub> Co <sub>0.6</sub> Mn <sub>0.4</sub> O <sub>3</sub>   | 823  |       | 0.21 | 1573 | air                      | CS  |
| 67 | Pr <sub>0.7</sub> Sr <sub>0.3</sub> Co <sub>0.6</sub> Mn <sub>0.4</sub> O <sub>3</sub>   | 873  |       | 0.21 | 1573 | air                      | CS  |
| 67 | Pr <sub>0.7</sub> Sr <sub>0.3</sub> Co <sub>0.6</sub> Mn <sub>0.4</sub> O <sub>3</sub>   | 923  |       | 0.21 | 1573 | air                      | CS  |
| 67 | Pr <sub>0.7</sub> Sr <sub>0.3</sub> Co <sub>0.6</sub> Mn <sub>0.4</sub> O <sub>3</sub>   | 973  |       | 0.21 | 1573 | air                      | CS  |
| 67 | Pr <sub>0.7</sub> Sr <sub>0.3</sub> Co <sub>0.6</sub> Mn <sub>0.4</sub> O <sub>3</sub>   | 1023 |       | 0.21 | 1573 | air                      | CS  |
| 67 | Pr <sub>0.7</sub> Sr <sub>0.3</sub> Co <sub>0.6</sub> Mn <sub>0.4</sub> O <sub>3</sub>   | 1073 |       | 0.21 | 1573 | air                      | CS  |
| 68 | Pr <sub>0.5</sub> Sr <sub>0.5</sub> Co <sub>0.8</sub> Mn <sub>0.2</sub> O <sub>3</sub>   | 673  |       | 0.21 | 1573 | air                      | CS  |
| 68 | Pr <sub>0.5</sub> Sr <sub>0.5</sub> Co <sub>0.8</sub> Mn <sub>0.2</sub> O <sub>3</sub>   | 723  |       | 0.21 | 1573 | air                      | CS  |
| 68 | Pr <sub>0.5</sub> Sr <sub>0.5</sub> Co <sub>0.8</sub> Mn <sub>0.2</sub> O <sub>3</sub>   | 773  |       | 0.21 | 1573 | air                      | CS  |
| 68 | Pr <sub>0.5</sub> Sr <sub>0.5</sub> Co <sub>0.8</sub> Mn <sub>0.2</sub> O <sub>3</sub>   | 823  |       | 0.21 | 1573 | air                      | CS  |
| 68 | Pr <sub>0.5</sub> Sr <sub>0.5</sub> Co <sub>0.8</sub> Mn <sub>0.2</sub> O <sub>3</sub>   | 873  |       | 0.21 | 1573 | air                      | CS  |
| 68 | Pr <sub>0.5</sub> Sr <sub>0.5</sub> Co <sub>0.8</sub> Mn <sub>0.2</sub> O <sub>3</sub>   | 923  |       | 0.21 | 1573 | air                      | CS  |
| 68 | Pr <sub>0.5</sub> Sr <sub>0.5</sub> Co <sub>0.8</sub> Mn <sub>0.2</sub> O <sub>3</sub>   | 973  |       | 0.21 | 1573 | air                      | CS  |
| 68 | Pr <sub>0.5</sub> Sr <sub>0.5</sub> Co <sub>0.8</sub> Mn <sub>0.2</sub> O <sub>3</sub>   | 1023 |       | 0.21 | 1573 | air                      | CS  |
| 68 | Pr <sub>0.5</sub> Sr <sub>0.5</sub> Co <sub>0.8</sub> Mn <sub>0.2</sub> O <sub>3</sub>   | 1073 |       | 0.21 | 1573 | air                      | CS  |
| 69 | Pr <sub>0.5</sub> Sr <sub>0.5</sub> Co <sub>0.6</sub> Mn <sub>0.4</sub> O <sub>3</sub>   | 673  |       | 0.21 | 1573 | air                      | CS  |
| 69 | Pr <sub>0.5</sub> Sr <sub>0.5</sub> Co <sub>0.6</sub> Mn <sub>0.4</sub> O <sub>3</sub>   | 723  |       | 0.21 | 1573 | air                      | CS  |
| 69 | Pr <sub>0.5</sub> Sr <sub>0.5</sub> Co <sub>0.6</sub> Mn <sub>0.4</sub> O <sub>3</sub>   | 773  |       | 0.21 | 1573 | air                      | CS  |
| 69 | Pr <sub>0.5</sub> Sr <sub>0.5</sub> Co <sub>0.6</sub> Mn <sub>0.4</sub> O <sub>3</sub>   | 823  |       | 0.21 | 1573 | air                      | CS  |
| 69 | Pr <sub>0.5</sub> Sr <sub>0.5</sub> Co <sub>0.6</sub> Mn <sub>0.4</sub> O <sub>3</sub>   | 873  |       | 0.21 | 1573 | air                      | CS  |
| 69 | Pr <sub>0.5</sub> Sr <sub>0.5</sub> Co <sub>0.6</sub> Mn <sub>0.4</sub> O <sub>3</sub>   | 923  |       | 0.21 | 1573 | air                      | CS  |
| 69 | Pr <sub>0.5</sub> Sr <sub>0.5</sub> Co <sub>0.6</sub> Mn <sub>0.4</sub> O <sub>3</sub>   | 973  |       | 0.21 | 1573 | air                      | CS  |
| 69 | Pr <sub>0.5</sub> Sr <sub>0.5</sub> Co <sub>0.6</sub> Mn <sub>0.4</sub> O <sub>3</sub>   | 1023 |       | 0.21 | 1573 | air                      | CS  |
| 69 | Pr <sub>0.5</sub> Sr <sub>0.5</sub> Co <sub>0.6</sub> Mn <sub>0.4</sub> O <sub>3</sub>   | 1073 |       | 0.21 | 1573 | air                      | CS  |
| 70 | La <sub>0.9</sub> Ba <sub>0.1</sub> In <sub>0.9</sub> Sc <sub>0.1</sub> O <sub>3</sub>   | 873  | 0.019 | 0.21 | 1873 | O2                       | CS  |
| 70 | La <sub>0.9</sub> Ba <sub>0.1</sub> In <sub>0.9</sub> Sc <sub>0.1</sub> O <sub>3</sub>   | 973  | 0.019 | 0.21 | 1873 | O2                       | CS  |
| 70 | La <sub>0.9</sub> Ba <sub>0.1</sub> In <sub>0.9</sub> Sc <sub>0.1</sub> O <sub>3</sub>   | 1073 | 0.019 | 0.21 | 1873 | O2                       | CS  |
| 71 | La <sub>0.8</sub> Sr <sub>0.2</sub> Sc <sub>0.2</sub> Mn <sub>0.8</sub> O <sub>3</sub>   | 690  |       | 0.21 | 1673 | air                      | CS  |
| 71 | La <sub>0.8</sub> Sr <sub>0.2</sub> Sc <sub>0.2</sub> Mn <sub>0.8</sub> O <sub>3</sub>   | 714  |       | 0.21 | 1673 | air                      | CS  |
| 71 | La <sub>0.8</sub> Sr <sub>0.2</sub> Sc <sub>0.2</sub> Mn <sub>0.8</sub> O <sub>3</sub>   | 741  |       | 0.21 | 1673 | air                      | CS  |
| 71 | La <sub>0.8</sub> Sr <sub>0.2</sub> Sc <sub>0.2</sub> Mn <sub>0.8</sub> O <sub>3</sub>   | 769  |       | 0.21 | 1673 | air                      | CS  |
| 71 | La <sub>0.8</sub> Sr <sub>0.2</sub> Sc <sub>0.2</sub> Mn <sub>0.8</sub> O <sub>3</sub>   | 800  |       | 0.21 | 1673 | air                      | CS  |
| 71 | La <sub>0.8</sub> Sr <sub>0.2</sub> Sc <sub>0.2</sub> Mn <sub>0.8</sub> O <sub>3</sub>   | 833  |       | 0.21 | 1673 | air                      | CS  |
| 71 | La <sub>0.8</sub> Sr <sub>0.2</sub> Sc <sub>0.2</sub> Mn <sub>0.8</sub> O <sub>3</sub>   | 870  |       | 0.21 | 1673 | air                      | CS  |
| 71 | La <sub>0.8</sub> Sr <sub>0.2</sub> Sc <sub>0.2</sub> Mn <sub>0.8</sub> O <sub>3</sub>   | 909  |       | 0.21 | 1673 | air                      | CS  |
| 71 | La <sub>0.8</sub> Sr <sub>0.2</sub> Sc <sub>0.2</sub> Mn <sub>0.8</sub> O <sub>3</sub>   | 952  |       | 0.21 | 1673 | air                      | CS  |
| 71 | La <sub>0.8</sub> Sr <sub>0.2</sub> Sc <sub>0.2</sub> Mn <sub>0.8</sub> O <sub>3</sub>   | 1000 |       | 0.21 | 1673 | air                      | CS  |
| 71 | La <sub>0.8</sub> Sr <sub>0.2</sub> Sc <sub>0.2</sub> Mn <sub>0.8</sub> O <sub>3</sub>   | 1053 |       | 0.21 | 1673 | air                      | CS  |
| 71 | La <sub>0.8</sub> Sr <sub>0.2</sub> Sc <sub>0.2</sub> Mn <sub>0.8</sub> O <sub>3</sub>   | 1111 |       | 0.21 | 1673 | air                      | CS  |
| 72 | La <sub>0.3</sub> Sr <sub>0.7</sub> Co <sub>0.7</sub> Ti <sub>0.3</sub> O <sub>3</sub>   | 773  |       | 0.21 | 1773 | 5 vol% hydrogen in argon | SSR |
| 72 | La <sub>0.3</sub> Sr <sub>0.7</sub> Co <sub>0.7</sub> Ti <sub>0.3</sub> O <sub>3</sub>   | 823  |       | 0.21 | 1773 | 5 vol% hydrogen in argon | SSR |







|     |                                                |     |  |  |      |      |     |    |
|-----|------------------------------------------------|-----|--|--|------|------|-----|----|
| 103 | $\text{Pr}_{0.85}\text{Sr}_{0.15}\text{CoO}_3$ | 673 |  |  | 0.21 | 1573 | air | CS |
| 103 | $\text{Pr}_{0.85}\text{Sr}_{0.15}\text{CoO}_3$ | 773 |  |  | 0.21 | 1573 | air | CS |
